# Supplementary material for: A transcriptome based approach to predict candidate drug targets and drugs for Parkinson's disease using an in vitro 6-OHDA model
Source: Royal Society of Chemistry journal article supplement (doi:10.1039/d2mo00267a), 2022-12-20
Supplement: d2mo00267a2.pdf [file d2mo00267a2.pdf]

**Supplementary Table S1.** List of primers used in qRT-PCR assays

| Name    | Forward                    | Reverse                    |
|---------|----------------------------|----------------------------|
| AKR1C3  | CAACGAGACAAACGATGGGTG      | CTATGGCTTTCATGTCCTCTGC     |
| ACTNB   | ACGAAACTACCTTCAACTCC       | GATCTTGATCTTCATTGTGCTGG    |
| CEBPB   | TACACGGGACTGACGCAACC       | GCTTGAAACGGAAAAGATTCCCAA   |
| CSF2    | CCCTCCAACCCCGGAAACT        | GCCATGCCTGTATCAGGGTC       |
| D2      | GCC GGG TTG GCA ATG ATG CA | ACG GCG AGC ATC CTG AACT   |
| DAT     | TGA CTT CTA CCG GCT CTG    | AGA AGA CGA CGA AGC CGG AG |
| DDC     | GAG TCA CTG GTG CGC CAG GA | CCG TGC GAG AAC AGA TGG CA |
| GAPDH   | CATCTTCCAGGAGCGAGATCC      | AAATGAGCCCCAGCCTTCTCC      |
| GBA     | GTCGTGCTAAACCGCTCCTC       | GGCCCAGTTTCCAAAGCAAG       |
| GBA2    | CATATAGGCATGGGCTTGAG       | AGCTGCCAACGACAGAACTG       |
| GIRK2   | CACCAGTGAGATCCTGTGGG       | GCTAACTCGGCCAGCTCTTT       |
| HERPUD1 | GCAGAAACGTGAAGCCGTG        | TCCGCAAAGTTCCCCTTAGT       |
| ITGB1   | CCAAATGGGACACGGGTGAA       | GTTGTGGGATTTGCACGGG        |
| ITGB2   | TGC GTC CTC TCT CAG GAG TG | GGT CCA TGA TGT CGT CAG CC |
| LMX1A   | GCTCAGATCCCTTCCGACAG       | GAGGTGTCGTCGCTATCCAG       |
| LMX1B   | CCAAATGCCAGGGAACGACT       | CTGTAGTCTGTGCGGAGAGC       |
| LRRK1   | GCTCTACTTGGGAAACAACCC      | GCACATTGCTGATGGTCAGG       |
| LRRK2   | AGAATTCCACAGCTCCTACCAAG    | TCAGGGCCAAAGAATTTACCG      |

|        |                            |                            |
|--------|----------------------------|----------------------------|
| MAOA   | TGGACAAAGACTGCTAGGCG       | TGGTCAACGTGAGTGACAGG       |
| MAOB   | GCCATGAGCAACAAATGCG        | ACCTTTTGGTTCCTAAGAGTGTAAG  |
| NQO1   | GTTTGGAGTCCCTGCCATTCTG     | CCCTTGCAGAGAGTACATGGAG     |
| SNCA   | GGT GTG GCA GAA GCA GCA GG | CAA TGC TCC CTG CTC CCT CC |
| TH     | CATCATGGTAAGAGGGCAGGG      | CAAACGTCTCAAACACCTTCAC     |
| TXNRD1 | GCAGAACAGCGGAGAAAATGG      | TCACAAACACAACGGGCAGA       |
