# Supplementary material for: A transcriptome based approach to predict candidate drug targets and drugs for Parkinson's disease using an in vitro 6-OHDA model
Source: Royal Society of Chemistry journal article supplement (doi:10.1039/d2mo00267a), 2022-12-20
Supplement: d2mo00267a3.xlsx [file d2mo00267a3.xlsx]

## Sheet: Supplementary Table 2
Supplementary Table 2: The list of significantly changed genes for a threshold of Benjamini-Hochberg adjusted p-value < 0.05
Gene Symbol	p-value	Adjusted p-value	Fold Change
LNC-C20ORF96-4	1.52247e-12	6.93509e-08	4.18054
LOC100288798	2.69094e-12	6.93509e-08	2.75655
NQO1	5.17303e-12	8.88796e-08	3.58454
PRDM16	8.5538e-12	1.10224e-07	9.23279
MIEF1	1.24848e-11	1.28704e-07	11.2976
CCKBR	1.81891e-11	1.56257e-07	2.79621
LINC00842	2.68464e-11	1.94627e-07	4.05246
TUBA4A	3.02076e-11	1.94627e-07	1.99015
MT1F	5.30289e-11	3.03703e-07	0.340569
LNC-TMEM132C-7	1.12848e-10	5.81664e-07	9.57403
PIR	1.34865e-10	6.31952e-07	1.82358
ID3	2.03012e-10	8.72004e-07	0.326345
SLC4A11	2.30765e-10	9.14967e-07	1.73448
XLOC_L2_006578	3.31385e-10	1.22006e-06	2.33634
GDF15	3.99654e-10	1.28748e-06	3.96259
LOC100130417	3.91948e-10	1.28748e-06	0.356189
ABCB6	5.23564e-10	1.58745e-06	1.74682
ID1	5.96736e-10	1.61885e-06	0.272784
LNC-SLC4A3-3	5.68021e-10	1.61885e-06	2.90557
PRR5	6.5307e-10	1.68309e-06	1.94282
SCML4	8.92776e-10	2.1913e-06	0.394895
TEX19	9.92224e-10	2.32469e-06	2.68726
SCUBE1	1.17118e-09	2.62467e-06	0.349323
GADD45A	1.53933e-09	3.30596e-06	1.80584
LNC-MOCS3-3	1.71965e-09	3.5455e-06	0.55195
PLA2G2F	2.19482e-09	4.35115e-06	3.92856
ID2	2.51224e-09	4.79597e-06	0.370966
BGN	3.00751e-09	5.39734e-06	1.77461
LNC-CCDC125-6	3.03669e-09	5.39734e-06	2.40298
IGLL1	3.60493e-09	6.19374e-06	1.86942
CLDN5	3.96047e-09	6.58511e-06	0.525666
OSGIN1	5.85642e-09	9.43322e-06	2.2882
JRKL-AS1	9.40597e-09	1.42594e-05	2.76743
SNHG7	9.15198e-09	1.42594e-05	1.58133
UNKL	1.0926e-08	1.60905e-05	1.8104
RPH3A	1.19844e-08	1.7159e-05	0.604126
ARNTL	1.70257e-08	2.29019e-05	0.558652
CYSRT1	1.74722e-08	2.29019e-05	1.89701
IGFBP5	1.77727e-08	2.29019e-05	0.462226
RASL11B	1.72627e-08	2.29019e-05	0.592032
ITGB2	2.07555e-08	2.60932e-05	3.41417
LMNA	2.46625e-08	2.95629e-05	1.69085
SDR39U1	2.4337e-08	2.95629e-05	0.624425
PHLDA3	3.05876e-08	3.50357e-05	1.73375
AKR1C3	3.27446e-08	3.59104e-05	3.23664
PKD1L2	3.26543e-08	3.59104e-05	2.85828
LNC-WDR37-3	3.42206e-08	3.67472e-05	2.16386
AQP1	3.56624e-08	3.7514e-05	0.610986
UNC5B	4.06511e-08	4.19064e-05	0.551665
LNC-PRR15L-4	4.76114e-08	4.78279e-05	0.59756
SYNPO	4.8251e-08	4.78279e-05	0.587411
IGSF21	4.95467e-08	4.81855e-05	0.373705
RAD1	6.27438e-08	5.98901e-05	0.571201
TEX264	6.67357e-08	6.25423e-05	1.78223
LOC101927886	7.04254e-08	6.36844e-05	0.688582
REC8	7.03008e-08	6.36844e-05	0.657182
RHBDD3	7.19131e-08	6.39084e-05	1.46644
ENDOV	8.03317e-08	6.46971e-05	1.98176
GAS2L3	7.56922e-08	6.46971e-05	0.642316
LOC101928443	7.85756e-08	6.46971e-05	8.47328
MICALCL	7.78689e-08	6.46971e-05	0.493346
PACSIN1	8.00846e-08	6.46971e-05	0.546708
PIK3R1	7.71377e-08	6.46971e-05	1.69453
PLCB2	8.29385e-08	6.47724e-05	0.529862
SSUH2	8.27975e-08	6.47724e-05	0.589444
MT1X	8.62634e-08	6.63636e-05	0.507451
GABARAPL1	8.94116e-08	6.71769e-05	1.8755
ZFAT-AS1	8.99271e-08	6.71769e-05	2.83567
FAM222A	9.40755e-08	6.92719e-05	0.655636
CLSTN2	1.03194e-07	7.4916e-05	0.591522
RGAG4	1.09545e-07	7.73479e-05	0.603626
SNAI1	1.26599e-07	8.65707e-05	0.608449
UNC5A	1.26279e-07	8.65707e-05	0.587615
DAK	1.47683e-07	9.88597e-05	0.690594
SLC7A11	1.56383e-07	0.000103341	4.27939
CACNA2D2	1.61958e-07	0.000105671	0.589468
SNAR-G1	1.80012e-07	0.00011455	1.69793
TMED9	1.78698e-07	0.00011455	1.57393
SLC2A1	2.03953e-07	0.000128202	0.613135
DPP6	2.11396e-07	0.000131279	0.615871
ME1	2.35471e-07	0.000144489	1.63326
C14ORF144	2.53113e-07	0.000151351	0.627317
DHCR7	2.58399e-07	0.000151351	0.611581
NOL4L	2.56893e-07	0.000151351	0.658467
NEUROD2	2.63583e-07	0.000152653	0.615493
GAP43	2.67151e-07	0.000153	0.603131
ADRBK2	2.73543e-07	0.000153522	0.619373
SLC6A2	2.74019e-07	0.000153522	0.604916
CXCL1	2.77093e-07	0.000153575	0.616383
KCNMA1	2.9158e-07	0.000159885	0.528322
ACACA	3.46554e-07	0.000184219	0.656185
LINC00595	3.50253e-07	0.000184219	0.508924
PALM3	3.48987e-07	0.000184219	1.51958
CNTNAP5	3.63442e-07	0.000189225	0.618825
SEMA6C	4.09897e-07	0.000211277	1.59153
ZFYVE19	4.16511e-07	0.000212561	1.38434
KCNH2	4.24534e-07	0.000212895	0.576535
RPL28	4.25426e-07	0.000212895	1.6249
LNC-STIL-1	4.44678e-07	0.000218291	2.67042
PLK2	4.40677e-07	0.000218291	1.86506
SEC11C	4.79545e-07	0.000233186	1.40149
ABCA12	5.13891e-07	0.000247551	0.531237
ANGPTL4	5.3907e-07	0.000252219	2.44295
CD38	5.43154e-07	0.000252219	0.636744
DDIT3	5.4108e-07	0.000252219	2.48723
TKT	5.29053e-07	0.000252219	1.73118
ATF4	5.49331e-07	0.00025281	1.48784
TOR3A	5.72194e-07	0.000261001	1.35733
AMBP	5.88938e-07	0.000265919	1.45913
B4GALNT1	5.97181e-07	0.000265919	1.45946
ZNF423	6.06567e-07	0.000267221	0.644587
ENDOD1	6.63848e-07	0.000287541	1.65977
SLC35D3	6.81452e-07	0.000292706	0.57992
HECA	6.87221e-07	0.000292745	1.44639
CBR3	6.94646e-07	0.000293482	1.90524
LNC-RP11-712L6.5.1-1	7.86654e-07	0.000329653	1.93194
KANK4	8.01005e-07	0.00033296	0.585081
FSTL5	8.73036e-07	0.000359998	0.558328
IL20RA	8.94135e-07	0.000365772	0.591606
TNFRSF10A	9.28568e-07	0.000376867	1.62108
ASMTL	9.46328e-07	0.000381075	1.45414
SPATA3-AS1	1.01888e-06	0.00040711	7.51998
ELMO1	1.04739e-06	0.000415283	0.667384
DNAJB2	1.05783e-06	0.000416221	1.34888
CLIC5	1.08017e-06	0.00042179	1.51348
PEAR1	1.10702e-06	0.000429024	0.618376
ARL16	1.1176e-06	0.00042989	1.34988
TNFRSF10B	1.17345e-06	0.000448031	1.41777
LNC-ALG14-5	1.20214e-06	0.000455611	0.646627
ATF7IP	1.23676e-06	0.000458315	0.698153
DHRS7	1.23879e-06	0.000458315	1.42928
RD3	1.24484e-06	0.000458315	0.653706
SLA	1.26425e-06	0.000462159	0.603585
BEND6	1.31103e-06	0.000475885	1.53205
DDC	1.32766e-06	0.00047855	0.647862
LNC-FBXW11-3	1.37053e-06	0.000483854	0.623177
RPS27L	1.36368e-06	0.000483854	1.39242
MAFF	1.3909e-06	0.000487706	1.40072
LOC283140	1.40609e-06	0.000489695	1.80248
LINC01349	1.47283e-06	0.000503253	2.20572
PIDD1	1.4743e-06	0.000503253	1.48092
GSTM5	1.51764e-06	0.000511276	1.67747
SLC38A6	1.67439e-06	0.000560421	1.5002
PHF1	1.91059e-06	0.000635352	1.39615
CHAC1	1.99824e-06	0.000652906	1.94649
MAP2K6	2.01245e-06	0.000652906	0.731833
RELL2	2.01405e-06	0.000652906	1.41485
SCN5A	2.01014e-06	0.000652906	0.675064
PTPRU	2.05278e-06	0.000661304	0.67201
ATOH8	2.08583e-06	0.000667012	0.551231
LNC-MAP3K3-1	2.09638e-06	0.000667012	0.649651
CNTNAP2	2.10991e-06	0.000667198	0.584645
CYB5R1	2.12822e-06	0.000668884	1.43761
TTC39A	2.22416e-06	0.0006948	1.48171
ARRDC2	2.25959e-06	0.000701617	1.40675
LOC102724689	2.41857e-06	0.00073071	0.746972
MAFG	2.42417e-06	0.00073071	1.47348
NHSL2	2.38094e-06	0.00073071	0.698774
ZDHHC8	2.38794e-06	0.00073071	8.65462
LOC100129175	2.46484e-06	0.000738649	0.611716
TOR2A	2.50059e-06	0.00074503	0.680499
LNC-FAM189A2-1	2.54116e-06	0.000746941	0.405097
SYNPR	2.55047e-06	0.000746941	0.442056
FAS	2.68232e-06	0.000772387	1.86537
NREP	2.67014e-06	0.000772387	0.756909
BLOC1S2	2.89956e-06	0.000825719	1.3553
LOC101927501	2.9246e-06	0.000828271	1.61531
ABTB1	2.96715e-06	0.000835732	1.58968
C1QTNF1-AS1	2.98652e-06	0.000836615	0.584765
AIFM2	3.03024e-06	0.000840581	1.74969
GAS5	3.03329e-06	0.000840581	1.37786
WHSC1	3.05709e-06	0.000842646	0.698096
H3F3A	3.09815e-06	0.000844927	0.724012
LNC-C2CD4A-2	3.08745e-06	0.000844927	1.55444
SNORD3B-1	3.14291e-06	0.000852623	1.35818
OSBPL3	3.24931e-06	0.000866471	1.38685
PLK3	3.24368e-06	0.000866471	1.36655
VSTM1	3.2612e-06	0.000866471	0.573301
LOC102724238	3.305e-06	0.000873604	0.71766
PVRL4	3.39313e-06	0.000892325	1.7302
CKMT1A	3.43864e-06	0.000894407	0.724076
OSER1-AS1	3.42695e-06	0.000894407	1.38977
SLC18A1	3.45311e-06	0.000894407	0.654485
TXNRD1	3.49314e-06	0.000900251	1.73071
PPARGC1B	3.55871e-06	0.000912588	1.54538
TMEM71	3.63849e-06	0.000928428	9.32783
LINC01105	3.69091e-06	0.000937165	0.628645
FECH	3.72143e-06	0.000940281	1.38202
ZNF524	3.86155e-06	0.000970927	1.33293
LINC00665	3.94063e-06	0.000974786	0.649431
LNC-ARRDC3-1	3.95255e-06	0.000974786	1.93606
TXN	3.92783e-06	0.000974786	1.35569
ZNF713	3.91449e-06	0.000974786	1.78643
DDB2	4.05413e-06	0.000995077	1.44796
NUDT2	4.16656e-06	0.00101783	1.35371
FDXR	4.21885e-06	0.00102574	1.51375
SFPQ	4.24619e-06	0.00102754	0.714249
SRXN1	4.28378e-06	0.00103121	1.45125
XPNPEP2	4.30138e-06	0.00103121	0.610277
UCP3	4.3598e-06	0.00104038	0.589125
FAM162B	4.49818e-06	0.00106845	0.68689
ACTB	4.61987e-06	0.00109232	1.49742
ATF3	4.69844e-06	0.00110583	1.88567
LOC100129447	4.81913e-06	0.00112908	0.575615
TBX3	4.88008e-06	0.00113819	0.685348
ZC3HAV1L	4.98098e-06	0.0011513	1.61521
LOC102724551	5.01837e-06	0.00115476	0.687456
HMOX1	5.06541e-06	0.00115784	4.11207
LNC-TMEM85-1	5.09914e-06	0.00115784	1.87717
RARA	5.08019e-06	0.00115784	0.703972
MTRNR2L2	5.16257e-06	0.0011671	1.39625
ERGIC1	5.18531e-06	0.00116712	0.761726
LNC-KIAA0947-1	5.50872e-06	0.00122828	0.636932
BBC3	5.57563e-06	0.00123343	1.40906
LINC00958	5.75168e-06	0.00126694	1.66837
LOC284454	5.8585e-06	0.00128498	1.64308
ATP6V1F	5.98082e-06	0.00129883	1.39035
HCST	5.98477e-06	0.00129883	1.38758
UBE2D4	5.99724e-06	0.00129883	0.774384
DDOST	6.11636e-06	0.00131909	1.28072
LRRC2	6.23314e-06	0.00133312	1.45807
LMO3	6.27389e-06	0.00133442	0.638209
LNC-RP1-177G6.2.1-2	6.29101e-06	0.00133442	0.644446
LNC-WDR77-1	6.44831e-06	0.00136218	0.760929
ZNF622	6.49715e-06	0.00136689	1.31043
FTH1	6.59704e-06	0.00137667	1.5872
PTPRN2	6.57431e-06	0.00137667	0.686893
ZSCAN2	6.6872e-06	0.00138986	1.81343
VSTM2L	6.8372e-06	0.00140405	0.689174
ABHD4	7.06425e-06	0.00144492	1.59771
CABP7	7.13225e-06	0.00144734	0.557177
ULBP1	7.10973e-06	0.00144734	2.19805
CXCL16	7.21558e-06	0.00145448	0.676714
KEAP1	7.24106e-06	0.00145448	1.32901
PCDH18	7.28032e-06	0.00145448	0.677573
TLN2	7.38325e-06	0.00146837	0.705778
XBP1	7.40678e-06	0.00146837	1.36504
RNF112	7.51263e-06	0.00147798	0.702362
UBL4B	7.74742e-06	0.00151838	2.03822
FLCN	7.8825e-06	0.001539	1.34765
NPHP4	7.96658e-06	0.00154955	0.694154
ZSCAN18	8.02259e-06	0.00155457	1.33301
D21S2088E	8.13693e-06	0.00156496	2.4453
DNMT1	8.1261e-06	0.00156496	0.630907
EPB41L1	8.19721e-06	0.00157069	0.738508
LNC-THOC5-1	8.37124e-06	0.0015981	1.56684
LRIG1	8.55198e-06	0.0016206	1.39929
FAM212B	9.04597e-06	0.0017017	1.42238
EML5	9.43892e-06	0.00176152	0.703006
OTOR	9.5007e-06	0.00176152	0.513461
MAOB	9.55624e-06	0.00176547	0.636149
WDR45	9.61361e-06	0.00176973	1.31106
SLC47A1	9.75885e-06	0.00178657	1.64566
TFEB	9.77444e-06	0.00178657	1.39012
GDF10	9.88264e-06	0.00179997	0.482133
SAMD11	9.95639e-06	0.00180701	0.55072
LOC100128063	1.00557e-05	0.00181864	0.731888
AKR1C1	1.02019e-05	0.00183862	1.44491
LDLRAD4	1.03191e-05	0.00184714	0.700579
PIK3R2	1.03208e-05	0.00184714	0.739359
FAM195A	1.05024e-05	0.00187314	1.39807
LFNG	1.06818e-05	0.00189856	0.582768
DPEP3	1.08126e-05	0.00190865	0.567277
NMNAT1	1.07806e-05	0.00190865	1.78036
SQSTM1	1.09138e-05	0.00191993	2.03071
EGFR	1.10428e-05	0.00192946	0.766585
LNC-HIST2H2AA3-1	1.11877e-05	0.00194816	0.739525
NOL3	1.12366e-05	0.0019501	1.39703
ADCY7	1.13986e-05	0.00197158	0.692746
IKBKAP	1.1593e-05	0.0019985	0.701909
AP2A2	1.22615e-05	0.0020019	0.735567
ATP11A	1.19525e-05	0.0020019	0.678435
C9ORF129	1.21119e-05	0.0020019	0.658127
CUX2	1.17114e-05	0.0020019	0.537407
FOLR1	1.20437e-05	0.0020019	0.657627
INPP5F	1.19967e-05	0.0020019	0.725212
ITPKA	1.22405e-05	0.0020019	1.43966
MACROD2	1.16928e-05	0.0020019	0.66781
NFKBIB	1.21542e-05	0.0020019	1.35038
PRDM13	1.2073e-05	0.0020019	0.612777
TBXA2R	1.19307e-05	0.0020019	1.80543
TRIB3	1.20123e-05	0.0020019	1.42786
XK	1.21574e-05	0.0020019	0.642305
LNC-GPR27-2	1.23749e-05	0.00201192	0.599341
SYT7	1.24125e-05	0.00201192	0.538348
UHRF1	1.2731e-05	0.00205707	0.604869
HEY1	1.301e-05	0.00206971	0.687444
SHROOM3	1.28673e-05	0.00206971	0.666681
SLC30A3	1.29805e-05	0.00206971	0.720061
ZNF561	1.29823e-05	0.00206971	1.28707
CERS5	1.30648e-05	0.00207203	1.27319
LETM1	1.31309e-05	0.00207347	1.68691
OTOP1	1.31791e-05	0.00207347	0.644654
SF3A1	1.31945e-05	0.00207347	0.720434
CEBPB	1.32417e-05	0.00207457	1.89272
LNC-GFRA2-1	1.35836e-05	0.00210889	1.94014
LTF	1.38114e-05	0.00213783	0.631198
FLJ44635	1.40041e-05	0.00216116	0.633842
CAMK2B	1.42325e-05	0.00218229	0.671301
CCDC88B	1.43104e-05	0.00218229	1.59504
FTL	1.42357e-05	0.00218229	1.47486
LNC-TTC8-1	1.4288e-05	0.00218229	1.80777
ERP29	1.46238e-05	0.00218848	1.4843
KCNK1	1.44968e-05	0.00218848	0.707647
LOC101930426	1.46482e-05	0.00218848	1.92968
ODF3B	1.4608e-05	0.00218848	1.47088
SORBS2	1.46005e-05	0.00218848	0.612936
TGM1	1.45743e-05	0.00218848	1.35785
BAI2	1.47734e-05	0.00220081	0.734054
ADAMTS17	1.48736e-05	0.00220935	0.646167
BLVRB	1.51407e-05	0.00223599	2.04999
KCNMB1	1.52265e-05	0.00223599	0.685318
LRRC3C	1.52057e-05	0.00223599	0.661705
DQX1	1.53914e-05	0.00224106	1.50486
LOC102724571	1.53479e-05	0.00224106	1.35172
PIGM	1.53546e-05	0.00224106	0.733459
TSC22D1	1.5486e-05	0.00224848	0.724799
SPATA2L	1.56516e-05	0.00226613	1.33964
TMEM164	1.59006e-05	0.00229574	0.753316
HN1	1.59905e-05	0.00229625	0.721265
PDE6C	1.59932e-05	0.00229625	1.43642
VAMP8	1.61883e-05	0.0023178	1.49603
DENND2D	1.63588e-05	0.00233573	1.50251
GOLIM4	1.66125e-05	0.00234968	0.730047
GREB1	1.66808e-05	0.00234968	0.688324
HDGFRP2	1.6632e-05	0.00234968	1.63142
NUCKS1	1.67118e-05	0.00234968	1.27347
RPS19BP1	1.673e-05	0.00234968	1.28684
ZNF532	1.66476e-05	0.00234968	0.772984
PSMC2	1.68393e-05	0.0023586	1.33449
WIPF2	1.70476e-05	0.0023813	0.700975
BEND3	1.72719e-05	0.00240612	0.737619
C6ORF48	1.73765e-05	0.00241417	1.2959
TREX1	1.78265e-05	0.00247002	1.45281
RCOR1	1.82773e-05	0.0025257	0.758544
LNC-REEP5-1	1.83662e-05	0.0025312	1.93302
HEIH	1.84312e-05	0.00253338	1.37672
LNC-GNG8-1	1.88445e-05	0.00258331	1.61136
MMAB	1.90188e-05	0.00260028	0.697868
LINC-PINT	1.91807e-05	0.00261548	1.58386
ADAMTS14	1.93102e-05	0.00262619	0.610543
DNMT3B	1.94913e-05	0.00264384	0.685198
LOC100132593	1.9841e-05	0.00267718	1.525
FAM207A	1.99183e-05	0.0026806	1.30325
CLMN	2.01337e-05	0.00268853	0.636833
EID3	2.01175e-05	0.00268853	1.59886
COMTD1	2.02186e-05	0.00269289	1.29424
DHRS7B	2.03643e-05	0.00270334	1.37335
RIMS1	2.04311e-05	0.00270334	0.667864
LIMCH1	2.0607e-05	0.00271654	0.729215
BIRC7	2.072e-05	0.00272447	1.44834
KPNA3	2.10463e-05	0.00272668	0.755394
LNC-C21ORF67-5	2.09677e-05	0.00272668	1.63045
SOAT2	2.09806e-05	0.00272668	0.718096
SUMO3	2.10542e-05	0.00272668	0.784897
LNC-AL353597.1-1	2.13074e-05	0.00273521	1.51707
LOC102723826	2.13048e-05	0.00273521	1.38325
TLX2	2.13323e-05	0.00273521	0.730832
MIPEP	2.18173e-05	0.00278354	1.32335
KIAA1614	2.19815e-05	0.00279067	0.663489
UPP1	2.19498e-05	0.00279067	1.52391
FAM117B	2.21159e-05	0.00280084	0.768714
TMEM54	2.24294e-05	0.00283358	1.40394
GATA2-AS1	2.2799e-05	0.00285803	0.725894
NFKBIL1	2.28217e-05	0.00285803	1.29207
NOB1	2.28447e-05	0.00285803	1.33068
LZTS2	2.2935e-05	0.00286238	1.4208
STXBP4	2.31663e-05	0.00288427	0.74784
TTC28	2.32961e-05	0.00289343	1.85636
LOC101930159	2.34945e-05	0.00290407	0.762682
SLC35F3	2.34711e-05	0.00290407	0.708918
LETMD1	2.36668e-05	0.00291838	1.37784
LNC-PRR16-1	2.38522e-05	0.00293422	3.18817
KIAA1549L	2.39546e-05	0.0029398	0.71971
LNC-CCDC90B-1	2.43758e-05	0.00297731	1.76458
WASF3	2.4744e-05	0.00301514	0.745102
XPR1	2.48916e-05	0.00302598	0.75619
CBX7	2.50142e-05	0.00303372	1.36287
AMDHD2	2.52076e-05	0.00303575	1.45555
CCHCR1	2.51666e-05	0.00303575	1.34397
NPPB	2.56164e-05	0.00306591	0.685158
SEZ6L	2.55995e-05	0.00306591	0.744311
LNC-CEP152-1	2.57207e-05	0.00306886	0.705662
CLIC1	2.61341e-05	0.00309403	1.3459
DNAJB11	2.6147e-05	0.00309403	1.37548
LNC-KIDINS220-2	2.62318e-05	0.00309403	0.693214
SEPHS2	2.62039e-05	0.00309403	1.27933
STK19	2.63866e-05	0.00310518	1.29588
FLJ41733	2.66308e-05	0.00312243	1.42893
LOC100128079	2.66543e-05	0.00312243	0.730836
CSTF3	2.68243e-05	0.00312708	0.716614
LOC283335	2.6876e-05	0.00312708	1.59244
LNC-MAP2K6-2	2.70634e-05	0.00313473	1.85644
TUSC8	2.70466e-05	0.00313473	0.662047
C1ORF21	2.76966e-05	0.00318659	0.785685
HIC2	2.76702e-05	0.00318659	0.721864
RBP1	2.75965e-05	0.00318659	0.733097
TOMM20L	2.77958e-05	0.00319088	1.77813
DNAJB9	2.82341e-05	0.00322683	1.27807
LOC100129461	2.82337e-05	0.00322683	0.770299
DOK1	2.84184e-05	0.00323398	1.26211
MIF	2.84222e-05	0.00323398	0.756911
MANBA	2.86562e-05	0.00324687	1.39386
EGFLAM	2.87355e-05	0.00324812	0.630903
RPL31	2.89186e-05	0.00326167	1.31319
IFI27L1	3.00974e-05	0.00335179	1.32113
KRT80	3.01079e-05	0.00335179	0.700833
SNX21	3.00117e-05	0.00335179	1.32339
ZMIZ1	2.98631e-05	0.00335179	0.769619
NDUFA7	3.04539e-05	0.00337573	0.801293
CDC42	3.08797e-05	0.00341559	0.719167
WNT2B	3.09491e-05	0.00341593	1.65922
ZNF84	3.12572e-05	0.00343646	1.29296
ZNF394	3.18541e-05	0.00348596	1.24931
FRMD3	3.22027e-05	0.0035018	0.616877
HPCA	3.2732e-05	0.00355187	0.637858
LARP6	3.30428e-05	0.00356309	1.42467
LOC100130560	3.30228e-05	0.00356309	0.705349
LOC100507054	3.31151e-05	0.00356344	1.37424
GYS1	3.31882e-05	0.00356386	0.772899
C2ORF81	3.37615e-05	0.00358363	0.783355
SARDH	3.35828e-05	0.00358363	0.733955
SESN2	3.34777e-05	0.00358363	1.45363
SLC6A6	3.37161e-05	0.00358363	0.766761
HVCN1	3.43966e-05	0.00364053	0.777209
CST3	3.49017e-05	0.00367565	1.45109
SRRM4	3.48751e-05	0.00367565	0.611933
UVSSA	3.49423e-05	0.00367565	0.647288
ATP1B2	3.5684e-05	0.00373863	0.735612
SRSF1	3.56861e-05	0.00373863	0.73241
LOC100505811	3.61403e-05	0.00377088	1.87821
BICC1	3.64852e-05	0.0037763	1.70218
KCNQ2	3.64781e-05	0.0037763	0.63257
BATF3	3.74384e-05	0.00383466	1.34972
ELOVL6	3.72126e-05	0.00383466	0.751546
NT5C	3.73242e-05	0.00383466	1.26958
TBC1D5	3.73975e-05	0.00383466	0.711353
ZNF142	3.74955e-05	0.00383466	0.72872
CRYGC	3.81506e-05	0.00389393	0.671799
DUSP4	3.86152e-05	0.00393356	1.33982
P2RY6	3.91322e-05	0.00397837	1.75988
COX4I2	3.9347e-05	0.00399233	0.713512
MYC	3.95402e-05	0.00400405	0.690094
LNC-NDST1-1	3.96805e-05	0.00401038	0.782031
POU3F2	4.04857e-05	0.00407578	0.583453
LNC-B4GALNT1-2	4.06609e-05	0.00408543	0.706332
EEF2K	4.08934e-05	0.00408697	0.755911
GGA1	4.07742e-05	0.00408697	1.37888
RCC2	4.11645e-05	0.00410403	0.731903
TGFB1I1	4.16505e-05	0.00414446	1.46156
FOXA1	4.25554e-05	0.00422003	1.80026
HMGB3	4.25736e-05	0.00422003	0.702764
SDHAF1	4.32589e-05	0.00427972	1.27617
PGPEP1	4.3416e-05	0.00428704	1.33257
IQSEC1	4.43513e-05	0.00435646	0.760666
RORB	4.43726e-05	0.00435646	0.734462
KRT19	4.46495e-05	0.00437527	0.704896
MMACHC	4.49825e-05	0.00438294	0.761766
KIAA0586	4.51692e-05	0.00439283	0.758694
SLC27A3	4.54024e-05	0.0044072	1.27443
AHDC1	4.55184e-05	0.00441015	0.627621
FLNB	4.57395e-05	0.00442326	0.752747
LNC-KLHL31-2	4.58374e-05	0.00442443	1.2679
FAM127C	4.60087e-05	0.00443266	0.709404
LOC101929626	4.61102e-05	0.00443415	0.738979
C19ORF48	4.63202e-05	0.00443779	1.42545
PMEPA1	4.63011e-05	0.00443779	0.779977
NR4A3	4.69616e-05	0.00449089	0.700346
KCNN3	4.75844e-05	0.00453362	0.730204
ZNF385D	4.80383e-05	0.00456842	0.725506
DHCR24	4.81494e-05	0.00457056	0.677569
LOC153811	4.82647e-05	0.00457308	0.738268
DNAJC1	4.83821e-05	0.00457579	1.35376
MGAT5	4.84879e-05	0.0045774	0.750615
LNC-CPEB2-5	4.86861e-05	0.00458771	1.53839
ZDHHC8P1	4.87827e-05	0.00458842	0.747014
SREBF1	5.02461e-05	0.00471746	0.594018
BOLA3	5.09313e-05	0.00477309	0.78536
PDZK1	5.10447e-05	0.00477504	0.687215
SSH2	5.12567e-05	0.00478619	0.743262
ETV2	5.18716e-05	0.00483485	1.35253
LOC101928741	5.27461e-05	0.00487796	1.88885
LOC646214	5.26329e-05	0.00487796	0.721651
PFAS	5.27607e-05	0.00487796	0.697019
FAM167A	5.29273e-05	0.00488029	0.731608
TMEM59	5.30964e-05	0.00488714	1.25538
SRSF6	5.36247e-05	0.00492287	0.75565
DDRGK1	5.4176e-05	0.0049454	1.32334
LINC00944	5.4199e-05	0.0049454	1.75122
LNC-ZC3H12D-2	5.42091e-05	0.0049454	1.89655
LYN	5.48594e-05	0.00499589	0.747163
LNC-NTN3-1	5.49847e-05	0.00499847	0.721624
PRR22	5.5174e-05	0.00500685	0.796955
LNC-CCDC140-5	5.53559e-05	0.00501453	1.3977
LOC100996664	5.55291e-05	0.00502139	1.43027
TARDBP	5.59334e-05	0.00504909	0.764337
GPR158	5.65365e-05	0.00508973	0.748907
RPA4	5.6581e-05	0.00508973	1.94171
MLLT1	5.74934e-05	0.00516279	0.807617
PLCH2	5.76832e-05	0.00517082	0.717741
ADAM1A	5.78398e-05	0.00517586	0.80015
LNC-RPP38-2	5.79427e-05	0.00517608	1.99996
FERMT1	5.81995e-05	0.00518106	0.716471
ZNF2	5.81065e-05	0.00518106	1.5876
PRKD3	5.91095e-05	0.00523494	0.789607
SLC9A4	5.9095e-05	0.00523494	1.28036
FAM50A	5.93806e-05	0.00524866	1.26573
LOC101928880	5.953e-05	0.00524866	0.670367
SWI5	6.04256e-05	0.00531498	1.24999
HS3ST5	6.07428e-05	0.00533377	0.762004
LGALS7	6.09201e-05	0.00534025	1.53383
TNNC2	6.13835e-05	0.00537173	1.29907
FLYWCH1	6.16089e-05	0.00538232	1.30097
LNC-HBEGF-2	6.19587e-05	0.00540372	0.743237
ARFGAP1	6.23636e-05	0.0054096	1.24415
CCDC107	6.24072e-05	0.0054096	1.23165
LTBP4	6.2184e-05	0.0054096	1.35753
NDRG4	6.24459e-05	0.0054096	1.28608
HCN4	6.298e-05	0.00544457	0.745126
RANBP2	6.30941e-05	0.00544457	0.73886
PRKAR2B	6.35286e-05	0.00546664	0.779606
TRAF7	6.40552e-05	0.00550277	0.744189
ATAT1	6.50107e-05	0.00551413	0.791656
CRELD1	6.46254e-05	0.00551413	1.41091
RPGR	6.44621e-05	0.00551413	0.693986
RPS27	6.43194e-05	0.00551413	1.28409
SLC25A22	6.48728e-05	0.00551413	0.729749
CASK	6.58953e-05	0.00557719	0.768704
NAT9	6.62723e-05	0.0055999	1.2564
NCLN	6.6521e-05	0.00560631	1.28245
ZDHHC12	6.65656e-05	0.00560631	1.28432
ISCU	6.78734e-05	0.00568856	1.27483
SCN4B	6.77346e-05	0.00568856	1.51838
LOC101928738	6.84849e-05	0.0057305	0.69623
TBCD	6.86281e-05	0.00573317	0.744462
DDX46	6.894e-05	0.00574446	0.726147
PCDHB16	6.89861e-05	0.00574446	0.715792
ZNF462	6.91733e-05	0.00575076	0.78782
LNC-DYDC1-4	6.94529e-05	0.00576122	1.51768
RBMS2	6.95227e-05	0.00576122	1.35733
XLOC_L2_005921	6.96656e-05	0.00576379	0.725626
NQO2	6.98811e-05	0.00577236	1.27265
PRKRIP1	7.00475e-05	0.00577685	1.35307
ERICH3	7.05664e-05	0.00580108	0.602458
MGC57346-CRHR1	7.04864e-05	0.00580108	1.66354
PSMD9	7.0869e-05	0.00581668	1.25443
LNC-RAB2A-1	7.11492e-05	0.00583039	1.57435
LOC100128108	7.20639e-05	0.00587732	1.25653
ACBD7	7.23406e-05	0.00589056	1.41394
GALM	7.33246e-05	0.00593319	1.3431
KRT79	7.32323e-05	0.00593319	1.81814
CDKN1A	7.37479e-05	0.00595809	1.83676
TINAGL1	7.4373e-05	0.00599919	0.51134
LOC729162	7.48166e-05	0.00602555	1.30282
ZNF658	7.52156e-05	0.00604823	1.33247
CCDC142	7.60144e-05	0.00608744	1.26979
CETN2	7.6039e-05	0.00608744	0.74602
SRSF7	7.61757e-05	0.00608744	0.722898
TMEM159	7.61582e-05	0.00608744	1.37361
CYBRD1	7.67861e-05	0.00611725	1.60118
ADRM1	7.70419e-05	0.00612816	1.36703
ZNF501	7.7448e-05	0.00615097	1.47484
LNC-ARRB2-2	7.75935e-05	0.00615305	2.00468
CREB3L4	7.80435e-05	0.00616867	1.2996
LINC01564	7.81496e-05	0.00616867	1.92414
TRIM16L	7.79592e-05	0.00616867	1.40564
LOC256880	7.85377e-05	0.00618983	0.680173
SPATA18	7.88674e-05	0.00620633	1.34352
LNC-GATA4-1	7.91088e-05	0.00621583	0.708421
SQLE	7.95115e-05	0.00623796	0.641873
EME1	7.99833e-05	0.0062531	1.53335
SLC25A37	8.00963e-05	0.0062531	0.782544
TOP2B	8.01898e-05	0.0062531	0.795609
ZNF618	7.98524e-05	0.0062531	0.780205
LOC100289495	8.0364e-05	0.00625723	1.3658
LNC-API5-1	8.09712e-05	0.006295	1.44722
BAK1	8.26661e-05	0.00641708	1.30823
STAR	8.27932e-05	0.00641728	0.716395
LNC-SLC7A5-1	8.29339e-05	0.00641853	1.35569
ERVMER34-1	8.38816e-05	0.00647245	0.71348
GPR182	8.46974e-05	0.00652562	1.83902
NME6	8.49841e-05	0.00653794	1.57822
MYCNOS	8.63499e-05	0.00662324	0.712824
MTRNR2L1	8.6688e-05	0.0066393	1.30663
SLC26A9	8.7117e-05	0.00666225	0.751777
EPT1	8.74742e-05	0.00667539	0.789199
RMND1	8.75478e-05	0.00667539	1.23579
FOXN4	8.8392e-05	0.00669314	0.663112
KCTD15	8.83804e-05	0.00669314	0.760328
LNC-HIVEP1-3	8.84299e-05	0.00669314	1.36968
PPP6R1	8.81867e-05	0.00669314	2.0481
CPLX1	8.86309e-05	0.00669785	0.758245
GSR	8.89388e-05	0.00670214	1.26639
LNC-SNX18-1	8.96994e-05	0.00674959	1.91786
SNORA48	9.0136e-05	0.00677255	1.39497
LOC727993	9.18445e-05	0.0068662	1.50334
MPDZ	9.18005e-05	0.0068662	0.797384
RCN1	9.16293e-05	0.0068662	1.31513
LOC100129894	9.22055e-05	0.00687792	0.711319
OPLAH	9.57192e-05	0.00709039	1.49278
OR2A12	9.57418e-05	0.00709039	1.53711
RAPGEF3	9.6741e-05	0.00715411	0.770822
LINC00592	9.74864e-05	0.00718861	0.63986
PHYHIPL	9.77148e-05	0.00719516	0.751437
WHAMMP1	9.8233e-05	0.00721355	1.25043
POLR2J2	9.84983e-05	0.00722115	1.69685
C9ORF106	9.91874e-05	0.0072518	1.64888
MYDGF	9.94825e-05	0.00726099	1.27798
SMO	9.95949e-05	0.00726099	1.30198
RPSAP58	9.98699e-05	0.0072667	1.28182
TMEM141	9.99552e-05	0.0072667	1.28262
KRTAP10-9	0.000100148	0.00727048	1.65238
LINC01535	0.000101051	0.00731539	1.55804
MRPL28	0.000100996	0.00731539	1.29006
AIMP1	0.000101558	0.00733149	1.21714
ITPKC	0.000101713	0.00733247	1.29192
ROM1	0.000102101	0.00735013	1.54146
CBLN4	0.000102395	0.00735214	0.617044
LNC-NBPF3-4	0.000102414	0.00735214	1.46943
TOR1B	0.000102932	0.00737904	1.27074
SERPINH1	0.000103341	0.00739807	1.29012
DNAJC15	0.000103553	0.00740296	0.783602
LOC400548	0.000103935	0.00741999	0.719144
ACRC	0.000104716	0.00745268	1.27438
ASPSCR1	0.000104574	0.00745268	1.24188
TCEB3-AS1	0.000104827	0.00745268	0.666506
POLA1	0.000105123	0.00746346	0.720391
PAK2	0.000105744	0.00746637	0.758701
PIGY	0.000105703	0.00746637	1.37025
TMUB1	0.000105455	0.00746637	1.26104
RBFA	0.000106068	0.00747901	0.780959
LINC00957	0.000107284	0.00753386	1.42728
LOC100506499	0.000107038	0.00753386	1.51265
ZMAT3	0.000107253	0.00753386	1.41534
YBX1	0.000107577	0.00754418	0.678102
ZNF181	0.00010805	0.00755819	1.35748
ZNF219	0.000108071	0.00755819	1.28543
CCDC74B	0.000108415	0.00756701	0.744617
LNC-EPHA6-1	0.00010849	0.00756701	1.40799
PDE4A	0.000108909	0.00757571	1.42651
ZNF692	0.000108868	0.00757571	1.30781
SRRT	0.000109102	0.00757891	0.73619
ATMIN	0.000110015	0.00762182	0.744194
SCPEP1	0.000109904	0.00762182	1.49479
HRH3	0.000111717	0.00771894	0.70618
XLOC_L2_015585	0.00011255	0.00776611	1.89661
AK3	0.000113191	0.00778945	0.782279
GRHL1	0.000113072	0.00778945	0.704439
ELOVL2	0.000114197	0.00783639	0.665287
GDI2	0.000114329	0.00783639	1.30014
ZNF581	0.000117098	0.00799431	1.31715
GPATCH2L	0.000117374	0.00800252	1.27228
ALKBH3	0.00011754	0.00800327	1.24364
STXBP5L	0.000118029	0.008026	0.743733
LOC100506403	0.0001184	0.00804062	1.4082
LOC284600	0.000120633	0.00817067	1.24934
AP1B1	0.000120952	0.00817809	0.774108
PEG3	0.000121059	0.00817809	0.664595
DPF3	0.000123035	0.00828644	0.620599
LNC-MKL1-1	0.000123306	0.00828644	1.43597
FAM104B	0.000123785	0.00829697	0.781236
CEP41	0.000125048	0.00835988	0.769177
TRIM33	0.000124896	0.00835988	0.790312
DGCR2	0.000125666	0.00839031	0.810316
HNF4A-AS1	0.000127077	0.00846801	0.653854
HNRNPA0	0.000127158	0.00846801	0.734513
SLC12A4	0.000127901	0.00850646	1.45394
METTL16	0.000128284	0.00852096	0.797643
RANBP3	0.00012923	0.00857278	0.812362
LNC-KIFC3-1	0.00012985	0.00859177	2.0976
SYT9	0.000129755	0.00859177	1.54816
PPP2R5E	0.000130284	0.00859808	0.814087
PTMA	0.000130139	0.00859808	0.786702
TBX4	0.000131869	0.00866974	1.3686
CHST7	0.000132111	0.00867458	1.31343
DNAJC30	0.000132299	0.00867582	0.749813
BAX	0.000134884	0.00883412	1.35271
LNC-TPBG-2	0.000135522	0.00885341	1.42898
ELP6	0.000136637	0.00890367	1.31002
GPATCH3	0.000136509	0.00890367	1.25059
ZNF302	0.00013756	0.0089525	1.35048
DYNC2H1	0.000138009	0.0089704	1.33155
SLC4A8	0.000138555	0.00898326	0.671085
RAI1	0.000139662	0.00904365	0.763481
TMEM208	0.00014111	0.00909674	1.21201
WDR90	0.000141188	0.00909674	0.653991
XLOC_L2_007456	0.000141149	0.00909674	1.50139
XLOC_L2_014504	0.00014086	0.00909674	1.59251
LNC-KAT7-4	0.00014197	0.00913573	1.46658
MAGI3	0.000142499	0.00915834	0.772018
ARID5A	0.000142907	0.00916171	1.27926
GCGR	0.000142838	0.00916171	0.633661
ORMDL3	0.000145345	0.00929488	1.28645
PYCRL	0.000147376	0.00940142	0.796725
FGF2	0.000148349	0.00943033	0.753872
SCFD2	0.000148245	0.00943033	0.800637
THSD7A	0.000148515	0.00943033	0.755185
ASIC4	0.000148882	0.00943906	0.633984
FAM155A-IT1	0.000149311	0.00944305	1.92546
HNRNPC	0.000149145	0.00944305	0.769891
GPR161	0.00014997	0.00947311	1.3722
HSCB	0.00015073	0.00950944	1.25173
SLC16A1	0.000151218	0.00952859	0.769612
CTSC	0.000151423	0.00952988	1.27197
LNC-SOX1-4	0.00015211	0.00956139	0.803098
LNC-DUSP4-1	0.000153643	0.009646	0.758837
KHDRBS3	0.000154337	0.00966606	1.36574
UBAC2-AS1	0.000154315	0.00966606	0.777961
LPCAT2	0.000154525	0.00966608	0.714258
MRPL55	0.000154732	0.00966729	1.24202
LNC-HMBOX1-1	0.000155652	0.00970121	0.782042
ZMAT4	0.000155504	0.00970121	0.688435
SOX11	0.000156718	0.00974123	0.745317
TPST1	0.000156669	0.00974123	1.34345
LAMA4	0.000157551	0.0097491	0.747143
LOC102723973	0.000157555	0.0097491	0.749466
SSC4D	0.000157177	0.0097491	1.22322
NBAT1	0.000157813	0.00975337	0.734051
CKAP2	0.00015845	0.00977358	0.752516
SMOX	0.000158519	0.00977358	1.37065
COX17	0.000159152	0.00980085	0.769248
PTP4A3	0.000160651	0.00986958	0.767184
UBE2G1	0.000160542	0.00986958	0.762031
HMGB3P1	0.000162542	0.00995018	0.768244
LNC-SUPT3H-1	0.000162459	0.00995018	1.907
LOC101928894	0.000163354	0.00996442	1.71375
RBFOX3	0.000163889	0.00997781	0.479969
SLC11A2	0.000164092	0.00997781	1.33134
TERF1	0.000164155	0.00997781	0.792455
PIM3	0.000164939	0.00999459	1.3221
POLD4	0.000165012	0.00999459	1.50101
MAP3K5	0.000165474	0.0100108	0.778965
PRL	0.000165754	0.010016	0.529908
GPAM	0.000166602	0.0100478	0.791621
ICAM2	0.000166671	0.0100478	0.65432
TFDP1	0.000166987	0.0100551	0.788246
LNC-TDRD9-AS1-1	0.000167529	0.0100642	0.809985
CCDC9	0.000168694	0.0101023	1.32116
CDC37L1	0.000168614	0.0101023	1.27509
SNORD31	0.000168751	0.0101023	0.759664
ATG9B	0.000169791	0.0101435	1.23882
FAM71E1	0.000169832	0.0101435	1.24305
ACAA1	0.000170879	0.0101867	1.22022
PRC1	0.000170951	0.0101867	0.676765
INPPL1	0.000171312	0.0101944	1.35007
SHANK2	0.000171475	0.0101944	0.697165
ARID1B	0.000171763	0.0101997	0.796229
ADNP	0.000172908	0.0102349	0.758053
LNC-RP11-116D17.1.1-6	0.000172952	0.0102349	0.72557
LNC-WDR69-2	0.000172567	0.0102349	1.51458
LOC400590	0.000173405	0.0102423	1.58887
MYCL	0.000173473	0.0102423	0.661508
CAMKV	0.000175548	0.0102578	0.694896
CES3	0.000175458	0.0102578	1.26021
HIST1H2BB	0.000174411	0.0102578	0.734232
HMBOX1	0.000174019	0.0102578	2.03923
HOXD3	0.000175277	0.0102578	0.731971
LNC-C9ORF103-1	0.000175751	0.0102578	0.606148
LNC-HNF1A-1	0.000175287	0.0102578	2.03883
NT5DC1	0.000175127	0.0102578	1.266
LNC-SNX11-2	0.000176362	0.0102716	1.72694
MCTP2	0.000177045	0.0102998	0.648358
PCBP2	0.000177637	0.0103226	0.800537
AQP10	0.00017936	0.0103876	0.600844
HLA-A	0.000179064	0.0103876	1.47412
THAP3	0.000180071	0.010417	1.2672
DTX1	0.000180903	0.0104309	0.770799
PRIMA1	0.000180918	0.0104309	0.695328
LNC-FOXN1-1	0.000181152	0.0104328	0.731318
ERC2	0.000182089	0.010475	0.7263
MAP6	0.00018242	0.0104824	0.72222
ERBB4	0.000182748	0.0104895	0.668263
TMEM160	0.000183273	0.010508	1.22924
MFSD2A	0.000185196	0.0105946	0.744389
GRM7	0.000186106	0.0106237	0.693732
HPDL	0.000186605	0.0106318	0.687067
ARHGAP9	0.000187549	0.0106583	1.59788
DRAP1	0.000188185	0.0106709	1.25179
ATG2B	0.00018942	0.0107291	0.808204
AKR1C8P	0.000190427	0.0107563	1.29292
DUSP5	0.000190527	0.0107563	1.34886
LOC728339	0.000190527	0.0107563	0.753104
ARHGAP26	0.000190998	0.0107593	0.713448
GRID1	0.000190937	0.0107593	0.763556
CAMSAP3	0.00019151	0.0107764	0.779671
SRCIN1	0.000192412	0.0108036	0.726563
TSHZ3	0.000193912	0.0108641	0.756994
LOC101928279	0.000194352	0.010877	0.795631
BEND4	0.00019554	0.0109198	0.704924
SAP30L	0.000196108	0.0109396	1.26065
TMPO	0.000196819	0.0109674	0.749565
C7ORF73	0.000200967	0.0111744	0.804432
RBM10	0.000202813	0.0112527	0.799108
CCDC66	0.000203432	0.011275	1.41235
TMEM223	0.000203716	0.0112785	1.22571
NCAM1	0.000206721	0.0114204	0.739341
PTTG1IP	0.000207011	0.0114242	1.27036
RIMBP2	0.000207397	0.0114332	0.7406
B3GNT5	0.000208179	0.0114519	0.808372
PPP2R5C	0.000208097	0.0114519	1.28444
DRGX	0.000208517	0.0114582	0.736654
MT1G	0.000209118	0.011479	0.718536
ASNS	0.000209489	0.0114871	1.37703
HDAC9	0.000210287	0.0115064	0.802623
RAB11FIP5	0.000210874	0.0115141	1.27982
BEND7	0.000212541	0.0115773	1.25114
MTHFD1L	0.000212444	0.0115773	1.28672
TUG1	0.000212706	0.0115773	0.740676
UQCR10	0.000214334	0.0116291	0.814355
LRP8	0.000215664	0.0116767	0.753288
LMF2	0.000216177	0.0116922	1.21639
SCNM1	0.000217052	0.0117272	1.19857
BCLAF1	0.000217445	0.0117361	0.803497
KIAA2018	0.00021959	0.0118395	0.704103
FBXL15	0.000220604	0.0118693	1.2273
FAT1	0.00022106	0.0118815	1.56284
RAB37	0.000221384	0.0118865	0.784464
INSL3	0.000222498	0.0119339	1.32038
PLXNA4	0.000223296	0.0119642	0.780764
FDX1L	0.000224265	0.0119739	1.2488
LOC100128226	0.000224187	0.0119739	0.713408
SEMA5B	0.000223732	0.0119739	1.36665
TTLL9	0.000225334	0.012011	1.26622
FLJ37035	0.000225844	0.0120257	1.42451
DOCK9-AS2	0.000228091	0.0121328	1.31265
LNC-RPP30-2	0.000228707	0.0121531	1.95465
STARD3	0.000229557	0.0121732	1.2768
TCAP	0.000229526	0.0121732	1.38999
SLC22A11	0.000229947	0.0121813	1.50067
FZD3	0.000231136	0.0122191	0.826298
ELP2	0.000232293	0.0122552	1.49658
MKI67	0.000232266	0.0122552	0.632477
KLF12	0.000234548	0.0123615	0.822156
HBP1	0.00023633	0.0124173	1.28248
CCNI	0.000236902	0.0124198	1.33178
FKBP11	0.000238545	0.0124198	1.32493
KIAA0319	0.000237645	0.0124198	1.2773
LOC727799	0.000237392	0.0124198	0.745773
MPP2	0.000237311	0.0124198	0.750997
NRSN1	0.00023812	0.0124198	0.689988
RPSAP52	0.000237834	0.0124198	1.20205
SYNCRIP	0.000236877	0.0124198	0.80039
XLOC_L2_001549	0.00023832	0.0124198	1.77749
L3HYPDH	0.000241765	0.0125703	1.41949
NR1H3	0.000242071	0.0125703	1.23525
ZNF92	0.000242411	0.0125703	0.757485
LAMP2	0.000243378	0.0126077	0.685831
LINC01273	0.00024422	0.0126386	1.40954
ALG5	0.000245259	0.012667	1.23501
SH3PXD2A	0.000245212	0.012667	0.775081
BAIAP2	0.000246145	0.0126848	0.74961
LINC00672	0.000245962	0.0126848	0.766924
FRA10AC1	0.000249712	0.0128265	0.691282
LOC148413	0.00024984	0.0128265	1.3469
LNC-NAA35-1	0.000250132	0.0128286	0.716519
PDZD2	0.000251043	0.0128626	0.678365
CALR	0.000252098	0.0128892	1.35258
LOC102724564	0.000252278	0.0128892	0.761127
KCTD11	0.000253295	0.012901	1.40461
PRADC1	0.000253219	0.012901	1.22287
GET4	0.000254216	0.0129338	1.26653
NCAPD2	0.00025444	0.0129338	0.724901
ADAM15	0.000255031	0.012951	1.221
DBNDD2	0.000256768	0.0130136	1.22624
LAMTOR4	0.000257289	0.0130272	1.21156
CLASP1	0.000258296	0.0130581	0.783861
OTUD1	0.000258405	0.0130581	1.32578
ACOXL	0.000259108	0.0130808	1.34194
AKAP8	0.000261984	0.0131848	0.813792
ST8SIA3	0.000261916	0.0131848	0.761065
XLOC_L2_015938	0.000261881	0.0131848	2.14248
BACH1	0.000262758	0.0132004	1.33353
BET1L	0.000263784	0.013239	1.39899
COMMD3	0.000264343	0.0132444	1.25374
ATP11C	0.000266737	0.0133353	0.780876
CERCAM	0.000266669	0.0133353	1.60897
LOC220729	0.000267205	0.0133457	0.755835
CCDC130	0.000268648	0.0133919	1.20814
ZC3H12B	0.000270593	0.0134369	0.794895
ANKS6	0.000271771	0.0134819	0.81341
ARFRP1	0.000272024	0.0134819	1.29922
LNC-RIT2-1	0.000272977	0.0135161	0.740236
LNC-RP11-116D17.1.1-5	0.000274771	0.0135789	0.775485
LOC101928832	0.000274651	0.0135789	1.46848
KLHL21	0.000277043	0.0136781	1.36622
SHROOM2	0.000277806	0.0137026	0.754843
HEPN1	0.00027884	0.0137274	1.29204
ATP5G1	0.000280114	0.0137769	0.802719
TDRD7	0.000281041	0.0137961	1.28468
TIAL1	0.000280847	0.0137961	1.21954
NF2	0.00028464	0.0139463	0.796331
AGMAT	0.00028523	0.0139619	0.821346
WDR7	0.000286047	0.0139886	0.83287
FAM20C	0.000289595	0.0141353	1.24529
LMO1	0.000289481	0.0141353	0.794518
THRAP3	0.000290561	0.014169	0.806103
ONECUT2	0.000292732	0.0142345	0.77009
UBQLN2	0.000293544	0.0142605	0.813282
DES	0.000294092	0.0142717	1.47588
LINC00240	0.000294374	0.0142717	1.2968
VMA21	0.000294605	0.0142717	0.818416
GPR179	0.000295797	0.014291	1.80508
TMED3	0.000295835	0.014291	1.32791
TNK1	0.00029546	0.014291	1.25477
IRF3	0.000296979	0.0143328	1.37299
ZC3H6	0.000297395	0.0143395	0.780385
RPA3	0.000297944	0.0143424	0.81129
SMAD9	0.000298012	0.0143424	0.789204
PANX2	0.000298412	0.0143483	1.39594
BCO2	0.000299856	0.0143811	1.48889
HTATSF1	0.000299891	0.0143811	0.804436
LEMD2	0.000300693	0.0143811	1.24353
OAS3	0.000300699	0.0143811	0.773148
SPEN	0.000300407	0.0143811	0.756142
ADAMTSL2	0.000301191	0.0143879	0.747947
LOC100996842	0.000302734	0.0144483	0.622837
EPHA8	0.000303249	0.0144594	0.718574
OCA2	0.000307506	0.014632	0.656183
ATP5J2	0.000307277	0.014632	0.827273
LNC-ARHGAP25-1	0.000307858	0.014632	1.53891
NRSN2	0.000308764	0.014632	1.60206
SARS	0.000308856	0.014632	1.21698
ZNF688	0.000308335	0.014632	1.23896
WNK2	0.000309567	0.0146523	0.717051
ZMYM4	0.000310214	0.0146694	0.828849
CES2	0.000311255	0.0146723	1.27564
LEPREL2	0.000311414	0.0146723	1.26198
PRODH	0.000312967	0.0147104	1.35871
QSER1	0.000313079	0.0147104	0.769091
DLG3	0.000313604	0.0147216	0.724174
MGAM	0.000314446	0.0147344	1.33715
HYAL3	0.000314756	0.0147355	1.21017
ENAH	0.000316226	0.0147775	0.754045
LRRC4	0.000316104	0.0147775	0.715426
MAP4	0.000317354	0.0148033	0.707441
PTDSS2	0.000317334	0.0148033	1.25949
DYNLL2	0.00031804	0.0148219	0.775195
RIMS2	0.000318505	0.0148302	0.784035
PPAP2C	0.00031884	0.0148324	1.27761
LNC-C2ORF69-3	0.000319597	0.0148542	1.66196
DMD	0.000320951	0.0148769	0.749063
FAHD1	0.000320941	0.0148769	0.79989
OR52K2	0.000320618	0.0148769	0.764832
COL24A1	0.000322703	0.0149184	1.31459
HSF1	0.000322685	0.0149184	1.19394
ST6GAL2	0.000323291	0.0149184	0.799648
XLOC_L2_012071	0.000324953	0.0149815	1.56447
MED14	0.000325923	0.0150128	0.79242
LOC728673	0.000326256	0.0150148	0.749756
GALK2	0.000326598	0.0150171	1.21951
RGS4	0.000328101	0.0150728	1.27559
SURF2	0.000329525	0.0151247	1.22675
C19ORF60	0.000329926	0.0151296	1.21636
TMEM79	0.000332967	0.0152555	1.26608
CYB5A	0.00033406	0.015292	0.815024
MIR7-3HG	0.000335131	0.0153274	0.746539
ERICH6-AS1	0.000336085	0.0153302	1.25914
LOC100129518	0.000335868	0.0153302	0.754854
MRPL11	0.000340093	0.0154856	0.81435
NDUFS5	0.000340841	0.015506	0.827959
LNC-GTPBP8-2	0.000342867	0.0155707	1.34493
IGSF23	0.000344325	0.0156231	1.25866
PELO	0.000347756	0.0157511	1.25493
RMDN3	0.000349229	0.0158039	1.23943
GNG8	0.000350726	0.0158577	0.758586
FCGRT	0.00035206	0.0159041	1.44249
C11ORF68	0.000352751	0.0159214	1.23604
MT1HL1	0.000353138	0.0159249	0.568177
LOC100996635	0.000355819	0.0160038	0.753164
CDK9	0.000356406	0.0160162	0.826357
ZNF767P	0.000357927	0.0160705	1.59616
PDIA3	0.000359036	0.0160923	1.31037
ZNF32	0.000359026	0.0160923	1.21117
NFYA	0.000360217	0.0161312	0.817008
CRABP2	0.000361913	0.0161791	0.68897
LNC-CNOT6-4	0.000362652	0.016198	1.34508
RPRD1A	0.000363732	0.0162322	0.821469
NLK	0.000364345	0.0162455	0.799177
AMD1	0.000366402	0.0162669	0.793171
ELAVL1	0.000366364	0.0162669	0.815586
LINC01481	0.000365676	0.0162669	0.802073
LNC-OPRL1-1	0.000366329	0.0162669	0.74309
XLOC_L2_012371	0.000366146	0.0162669	1.24656
LNC-CEACAM18-2	0.000367164	0.0162866	0.655199
F12	0.000368705	0.016341	0.764577
RADIL	0.00036931	0.0163537	0.736123
KCNQ1	0.000370114	0.0163752	0.745444
FBXL17	0.000371283	0.0163988	0.804801
MIR100HG	0.00037098	0.0163988	0.657762
MFNG	0.000371704	0.0164034	0.759341
ZCCHC2	0.000374407	0.0165003	1.266
HIST2H2BE	0.000375965	0.0165489	0.802028
PVT1	0.000377076	0.0165719	1.29165
ADAM12	0.000379761	0.0166591	0.698294
LNC-TCL1B-2	0.000380454	0.0166753	1.91075
LOC100507156	0.000382785	0.0167632	0.620188
DNER	0.000383614	0.0167852	0.767088
LNC-SGCG-5	0.000384351	0.0168032	0.787894
LNC-QPCT-3	0.000385542	0.016841	0.755264
GMPR2	0.000389376	0.0169941	1.21335
TOM1L1	0.000391231	0.0170606	1.31927
ADAM23	0.000394143	0.0170903	1.27328
APTX	0.000394375	0.0170903	1.18674
CRYM	0.000394566	0.0170903	0.744667
MATN4	0.00039235	0.0170903	1.5781
MIR600HG	0.000392765	0.0170903	0.785292
RFX2	0.000393375	0.0170903	0.763644
C15ORF59	0.000395215	0.0171041	1.40867
GLYCTK-AS1	0.000396538	0.0171469	0.779273
CENPF	0.000398795	0.0172175	0.703788
LOC90784	0.000398839	0.0172175	0.817657
LNC-SEPT9-3	0.000400836	0.017281	1.79185
YY2	0.000401487	0.0172884	1.29085
RACGAP1	0.000401922	0.0172927	0.739727
BAI1	0.000404115	0.0173436	0.708414
SLIT1	0.000404046	0.0173436	0.647072
YLPM1	0.000403906	0.0173436	0.796018
PPM1D	0.000405697	0.0173826	1.31829
CLIP4	0.000407024	0.0174244	1.25589
PAFAH1B1	0.000407348	0.0174244	0.80072
MEF2B	0.000408123	0.017443	1.33974
CCNT2-AS1	0.000409589	0.0174622	1.85876
ZNF791	0.000409508	0.0174622	1.26779
ATXN10	0.000410241	0.0174756	0.774955
SRR	0.000411135	0.0174992	0.804434
DOK4	0.000412217	0.0175239	0.80409
HYI	0.000412523	0.0175239	1.18924
ALDH1A3	0.000414367	0.0175354	0.717923
RTCB	0.000415342	0.0175623	1.25067
DHRS4L1	0.000415986	0.0175751	1.33968
ATP2C2	0.000417068	0.017593	0.76664
LNC-SOX6-1	0.000417282	0.017593	1.89881
TWIST1	0.000417435	0.017593	0.784886
HSP90B1	0.000419755	0.0176619	1.36178
MAP2K3	0.000420825	0.0176925	0.772221
LNC-GATAD1-2	0.000422241	0.0177376	1.27523
ZCWPW1	0.000424268	0.0178082	1.22232
CASC15	0.000424642	0.0178094	1.85794
TEAD1	0.000424993	0.0178096	0.81151
C17ORF85	0.000427139	0.0178705	0.825794
GPR68	0.000427824	0.0178846	0.713659
LOC100130093	0.000430423	0.0179787	1.3781
LOC730183	0.000433448	0.0180611	0.795567
SIRPG	0.000433431	0.0180611	1.3593
OTUD7A	0.000434484	0.0180897	0.749331
ERGIC2	0.000435058	0.018099	1.26242
SAFB	0.000435644	0.0181087	0.742227
LNC-LTBP3-2	0.000436879	0.0181454	1.4439
SPATA5	0.000438043	0.0181791	0.778361
ABLIM1	0.000440309	0.0182585	0.793968
ZNF826P	0.000440845	0.018266	0.72713
DYTN	0.000446616	0.0183943	1.68709
LNC-HMCN1-2	0.000447509	0.0183943	1.9387
MTR	0.000446176	0.0183943	0.784637
NDUFA3	0.000446978	0.0183943	0.819996
NOS2	0.000445293	0.0183943	0.739228
SFXN5	0.000446095	0.0183943	1.2087
ZNF426	0.000447282	0.0183943	1.30774
PHLDB3	0.000448726	0.0184296	1.29175
RGS2	0.000450885	0.0185035	0.788855
ANP32E	0.000451255	0.018504	0.796971
TMEM147-AS1	0.000451688	0.018507	1.26077
DRICH1	0.000452072	0.018508	1.30734
PCDHGC4	0.000453252	0.0185416	0.701927
EGLN3	0.000454951	0.0185554	0.755023
ING4	0.000455144	0.0185554	1.2459
KCNRG	0.00045539	0.0185554	0.700423
SORBS1	0.000454589	0.0185554	0.786164
ZNF133	0.000455042	0.0185554	1.24464
LPHN2	0.000456154	0.0185574	0.766655
FBXO44	0.000458121	0.0186226	1.33187
APLN	0.000462755	0.0187813	0.732816
FAM117A	0.000465509	0.0188634	0.797981
CXORF67	0.000469574	0.0189921	0.789939
TOMM40L	0.000469792	0.0189921	1.18185
FBXO8	0.000470952	0.0190241	1.27874
ULBP2	0.000472038	0.0190381	1.31707
C1ORF43	0.000474381	0.0191177	1.23991
GTF3C6	0.000475391	0.0191285	0.834103
MPC2	0.000475239	0.0191285	1.18476
CYP1B1-AS1	0.000479482	0.0192679	0.781424
TYRP1	0.000481792	0.0193407	0.728537
SERTAD1	0.000483214	0.0193827	1.33391
RNF165	0.000483763	0.0193896	0.776584
A1BG	0.000486005	0.0194519	1.31443
SLC35C2	0.000486072	0.0194519	1.28599
TEAD3	0.000486818	0.0194667	1.26217
AUTS2	0.000488532	0.0194846	0.814316
MAP2K4	0.000488472	0.0194846	0.780265
MAPK11	0.000488779	0.0194846	1.31577
TTC39C-AS1	0.000488375	0.0194846	0.760612
SMARCD3	0.000489277	0.0194894	1.21664
HOMER3	0.000491573	0.0194992	1.33116
LOC100133669	0.000491037	0.0194992	0.776875
LOC103312105	0.000491793	0.0194992	1.33264
LRRC37B	0.000490057	0.0194992	1.28053
OR52E8	0.000491427	0.0194992	1.41842
LIN37	0.000493149	0.019538	1.22479
CHN1	0.000493939	0.0195392	0.798519
LINC00599	0.000493797	0.0195392	0.690276
CCDC74A	0.000495909	0.0195871	0.737381
POPDC2	0.000495908	0.0195871	1.31878
PDCD4-AS1	0.000496542	0.0195895	0.806336
SOX7	0.000496729	0.0195895	0.743157
GAS7	0.000497251	0.019595	0.75689
LOC101927740	0.000498012	0.019595	1.63697
PIK3R3	0.000497822	0.019595	0.753341
IPO8	0.000500522	0.019674	0.818351
LINC00476	0.000500782	0.019674	0.717554
RAB42	0.000502155	0.0197031	1.39152
SNORA84	0.000502288	0.0197031	1.20319
SHC2	0.000503408	0.0197055	1.32265
VPS26B	0.000503314	0.0197055	0.813071
ZBTB7C	0.000503495	0.0197055	0.705012
LNC-TTC21A-2	0.000504714	0.0197382	1.45559
CDK12	0.000505176	0.0197413	0.809364
SPSB3	0.000508096	0.0198292	1.19958
TIAM1	0.000508194	0.0198292	0.824088
B3GAT3	0.000511944	0.0198675	1.24197
LNC-APPL2-1	0.000511119	0.0198675	1.5133
LNC-SNX24-1	0.000511581	0.0198675	1.71094
SULT1A2	0.00051134	0.0198675	1.26484
TKTL1	0.000512258	0.0198675	0.72393
TMEM136	0.000510982	0.0198675	1.34605
ZNF789	0.00051073	0.0198675	0.773746
VAV3	0.000514777	0.0199501	0.725258
TMEM253	0.00051614	0.0199879	1.27276
CCDC106	0.000517111	0.0200105	1.1994
MCF2L	0.000518026	0.0200308	0.761537
CTSL	0.000521721	0.0201343	1.3118
OPRM1	0.000522263	0.0201343	0.772787
PRPF38A	0.000522176	0.0201343	0.797374
PGLS	0.000523334	0.0201605	1.19655
DNTTIP1	0.000524	0.0201711	1.19092
BPTF	0.000527124	0.0202008	0.806307
C17ORF97	0.000526295	0.0202008	0.824481
MT1B	0.000526351	0.0202008	0.582037
REEP1	0.000526366	0.0202008	0.742051
JTB	0.000529273	0.0202681	1.21358
LOC102724734	0.000530834	0.0203128	1.2954
XLOC_L2_008013	0.000531529	0.0203243	0.813488
LNC-MFSD9-4	0.000535203	0.0204345	1.85801
LOC284395	0.000541334	0.0206075	0.738803
RCOR2	0.00054177	0.0206088	0.666188
KALRN	0.000542201	0.0206101	0.752114
MYCBP	0.000544716	0.0206904	0.813359
DEXI	0.000547424	0.0207779	0.845745
LNC-KIAA1755-6	0.000547836	0.0207783	0.776674
LNC-NOVA1-1	0.000551432	0.0208728	1.28573
TEX41	0.000551948	0.0208728	1.26999
CLN6	0.000553036	0.0208986	0.725004
CTNNA2	0.00055427	0.0209146	0.677113
ZFHX3	0.000554098	0.0209146	0.82897
LNC-SOCS6-3	0.000558075	0.0210274	0.758977
POLR1A	0.000558604	0.0210319	0.822713
NGEF	0.000559308	0.021043	1.29125
KCNJ12	0.00056048	0.0210564	0.72498
TRA2A	0.000560465	0.0210564	0.757513
HMGN2	0.000562412	0.0210982	0.788534
KITLG	0.000562186	0.0210982	1.4547
TSPAN11	0.00056417	0.0211488	1.39596
MT1DP	0.000565413	0.02118	1.32401
APOPT1	0.000569088	0.0212242	1.22688
GPM6B	0.000568126	0.0212242	0.727455
LNC-INTS9-1	0.000568355	0.0212242	0.807848
RAB29	0.000567518	0.0212242	1.32642
TUSC3	0.0005679	0.0212242	1.21527
ZSWIM5	0.000569475	0.0212242	0.800202
LGALS8	0.000575366	0.0214162	1.22154
MRPL9	0.000575458	0.0214162	1.31075
ELAVL3	0.000578757	0.0215079	0.669329
ZNF613	0.000578424	0.0215079	1.22978
TPGS2	0.000582933	0.0216475	0.835877
LNC-C12ORF75-1	0.000583693	0.0216601	1.24505
MPHOSPH6	0.000584317	0.0216676	0.794766
ZNF674-AS1	0.000585438	0.021678	0.78188
ADAMDEC1	0.000587259	0.0216987	0.764024
IFRD1	0.000586746	0.0216987	1.40041
NEBL	0.000587038	0.0216987	0.704163
AGBL4	0.000590778	0.0217583	0.768427
NOS1AP	0.000590962	0.0217583	0.742789
XLOC_L2_005952	0.000590982	0.0217583	1.30878
HSPH1	0.000591986	0.021775	0.815323
PLEKHA6	0.000592281	0.021775	0.744289
PPP6C	0.000594742	0.0218343	0.789916
LOC101928994	0.000595521	0.0218473	1.44468
CASP6	0.000596081	0.0218523	1.27919
SMAD7	0.00059691	0.0218672	0.80276
LOC101927974	0.000597603	0.021877	1.25879
TAF11	0.000599682	0.0219376	1.21268
AMZ2	0.000601334	0.0219668	1.19545
SGIP1	0.000600915	0.0219668	0.766947
DTYMK	0.000601955	0.0219739	0.775997
LNC-SRGAP3-1	0.000603042	0.021998	1.46119
RPL7	0.000604558	0.0220066	1.2792
TRAM1	0.000604488	0.0220066	1.21762
CTAG2	0.000605107	0.022011	1.27959
LMBR1	0.000606944	0.0220623	0.746268
CD86	0.000607671	0.0220731	1.80728
HMP19	0.000608214	0.0220773	0.760687
VPS18	0.000611767	0.0221907	1.72014
FCHO1	0.00061669	0.0222731	0.836038
PROM2	0.000616342	0.0222731	1.74444
TMOD1	0.000616638	0.0222731	1.21753
TRIM14	0.000617049	0.0222731	0.709135
SPI1	0.000617863	0.0222863	1.56593
NLGN4X	0.000621062	0.022386	0.688177
PLCD3	0.000622069	0.0224067	1.53353
AEN	0.000625441	0.0225124	1.25401
HES5	0.000627284	0.022563	0.737996
FLJ46552	0.000630716	0.0226233	1.33607
IARS2	0.000630126	0.0226233	1.20289
LINC01019	0.000630619	0.0226233	1.32449
LOC646588	0.000634115	0.0227195	0.719844
SORL1	0.000634279	0.0227195	0.732503
DPYSL5	0.000634723	0.0227196	0.716745
XLOC_L2_006832	0.000635862	0.0227445	1.29808
ZNF564	0.000637689	0.0227941	1.2686
TJP2	0.00063887	0.0228205	0.823345
ENKD1	0.000649612	0.023156	1.20492
LNC-PRM1-1	0.000653556	0.0232626	1.37332
LURAP1L-AS1	0.000653481	0.0232626	1.25715
SMIM12	0.000653956	0.0232626	0.817573
EIF4E	0.000655817	0.0233127	0.790522
HDAC2	0.000657366	0.0233356	0.732154
LNC-FUT8-1	0.000658221	0.0233499	1.71512
NPAS1	0.000660092	0.0234001	1.27985
GRINA	0.000661486	0.0234334	1.28716
PELI3	0.00066268	0.0234503	1.28035
SDF2	0.000662872	0.0234503	1.22352
KCNMA1-AS1	0.000669908	0.0236667	1.44132
HYAL4	0.000670732	0.023676	1.60485
LNC-RP11-201M22.1.1-2	0.000671091	0.023676	1.75771
C19ORF25	0.000672522	0.0236941	1.28377
LNC-SLC4A1AP-1	0.000672137	0.0236941	0.729691
AMACR	0.000675146	0.0237379	1.2998
S100A4	0.000674625	0.0237379	0.750066
CFAP53	0.000676554	0.0237448	1.4143
HR	0.000677064	0.0237448	0.734325
XLOC_L2_014057	0.000675855	0.0237448	1.45068
RITA1	0.000681043	0.0238638	0.832527
CLCC1	0.000686104	0.0240002	1.29598
ERCC5	0.000686331	0.0240002	1.21227
ZNF232	0.000686292	0.0240002	1.3115
ZBTB42	0.000687359	0.0240198	1.189
SHMT2	0.00069157	0.0241179	1.30302
UCHL1	0.000694255	0.0241788	1.23362
LNC-NRXN1-2	0.000694834	0.0241827	0.791697
LOC284648	0.000695423	0.0241845	1.40535
LOC403323	0.000696296	0.0241845	1.36171
RASSF8-AS1	0.000695844	0.0241845	0.831569
LNC-ZKSCAN1-1	0.000697179	0.0241989	0.758103
CKAP5	0.000699214	0.0242532	0.76018
HINFP	0.000700447	0.0242797	1.22303
CHRM1	0.000702904	0.0243484	0.694986
B3GALTL	0.000703584	0.0243556	0.84328
LNC-CALML6-1	0.000705364	0.0244008	1.3293
DDR1	0.000708696	0.0244834	1.26036
ZXDC	0.0007087	0.0244834	1.28654
LINC01116	0.000710392	0.0245254	0.736643
DHFRL1	0.000713216	0.02459	1.20633
ZBTB47	0.000713098	0.02459	1.26743
TIAM2	0.000714874	0.0246307	0.761823
LAMB1	0.000716871	0.0246666	1.18828
SP4	0.000716875	0.0246666	0.761285
EPHA2	0.000719278	0.0246868	1.40693
PHF2	0.000719718	0.0246868	0.804844
RGS5	0.000719856	0.0246868	0.817907
SCMH1	0.00071851	0.0246868	0.79823
SEMA3B	0.000720541	0.0246938	1.2945
RIN1	0.000722964	0.0247604	1.38865
LINC00634	0.000723593	0.0247655	0.794269
DOPEY1	0.000724744	0.0247885	1.29519
RER1	0.000725293	0.0247908	1.21466
LOC101927551	0.000726162	0.024804	0.782845
EIF2S1	0.000728181	0.0248401	0.805013
ABAT	0.000734523	0.0249016	0.685314
AFG3L1P	0.000732839	0.0249016	1.35139
ANK2	0.000734218	0.0249016	0.804467
BDH1	0.000732997	0.0249016	0.741831
CYP1B1	0.000734758	0.0249016	0.744041
KIF1C	0.000730634	0.0249016	1.45823
MPPED2	0.000731082	0.0249016	0.795613
TMEM109	0.000734815	0.0249016	0.809664
WDHD1	0.000733831	0.0249016	0.776403
SHC3	0.000737616	0.0249801	0.713075
NPY2R	0.000742512	0.0251129	0.659523
ADAT2	0.000749573	0.0252386	1.28325
AMER1	0.000747335	0.0252386	0.800158
LOC100507201	0.000748934	0.0252386	0.808245
PSMB1	0.000749424	0.0252386	1.182
SV2C	0.00074793	0.0252386	0.682266
LOC100289026	0.000751321	0.0252781	1.29877
UROD	0.000753177	0.025324	1.19708
LNC-C12ORF48-1	0.000755324	0.0253733	1.40261
RNU6ATAC	0.000756356	0.0253813	1.3448
CGRRF1	0.000756963	0.0253851	1.26364
KRTAP4-11	0.000757612	0.0253903	1.4259
CD151	0.000758374	0.0253994	1.20704
MON1A	0.000760476	0.0254367	1.21025
RBBP8NL	0.000760059	0.0254367	1.36926
PARP8	0.000768486	0.0256547	1.25181
CASP2	0.000769801	0.0256654	0.786863
MARCKS	0.000769637	0.0256654	0.782833
AS3MT	0.000781871	0.0258185	1.25349
BCL2L2	0.000779518	0.0258185	1.22796
C19ORF81	0.000781562	0.0258185	1.23337
CCNB1IP1	0.00078153	0.0258185	1.24015
CYB5D2	0.000780627	0.0258185	1.23544
LINC00221	0.000781341	0.0258185	0.823501
LINC00642	0.000782151	0.0258185	0.726896
LNC-HIST4H4-2	0.000778686	0.0258185	0.753174
LOC100130587	0.000776765	0.0258185	1.49298
MKL2	0.000781885	0.0258185	0.843206
MPV17	0.000783913	0.0258185	0.810819
NLGN4Y	0.000779983	0.0258185	0.778105
OSBPL7	0.000783494	0.0258185	0.792446
PAG1	0.000778203	0.0258185	0.769031
PAPOLA	0.000782484	0.0258185	0.745265
PBRM1	0.000782469	0.0258185	0.784104
SH3BP5L	0.000780933	0.0258185	1.21483
USP7	0.000784901	0.0258346	0.748557
EIF5	0.000787227	0.0258781	0.829713
TRNT1	0.000787162	0.0258781	1.23211
LNC-ITGA2-1	0.000793904	0.0260628	0.773693
MCEE	0.000794577	0.0260628	1.22522
P2RX5	0.000794843	0.0260628	0.800383
PAOX	0.00079487	0.0260628	1.31683
LNC-LGALSL-1	0.000796621	0.0261036	1.33907
EVL	0.000800297	0.0261742	0.833758
CALM1	0.000805671	0.0262749	0.768433
COQ5	0.000806722	0.0262749	1.22485
GGTA1P	0.000805358	0.0262749	0.749822
LNC-ANKRD18B-1	0.000805852	0.0262749	1.45194
MIB1	0.00080664	0.0262749	0.783866
POLR3GL	0.000806946	0.0262749	1.2467
EVI5L	0.000808292	0.0263021	1.23822
LNC-PDZD7-1	0.000810155	0.0263461	0.739292
AHI1	0.000811872	0.0263853	0.767013
MRPL32	0.000812623	0.0263931	1.22555
LINC01119	0.000814586	0.0264235	0.82779
PNMAL1	0.000816384	0.0264652	0.829464
NUPR1	0.00081713	0.0264727	3.29774
GRIN1	0.000817707	0.0264748	0.733748
SFXN2	0.000820361	0.0265274	0.76675
ZNF704	0.00082381	0.0266056	0.765536
LNC-SMARCC2-2	0.000826321	0.026625	0.73369
PMFBP1	0.000828338	0.0266682	0.76753
LNC-ALDH1A1-2	0.00082916	0.026678	1.32888
FLJ36777	0.000832648	0.0267736	1.27226
EPHB2	0.000835528	0.0268494	0.810405
AP3M2	0.000837316	0.0268901	0.808038
CISH	0.000839385	0.0269063	1.2846
HELZ	0.000839217	0.0269063	0.791708
RABAC1	0.000838864	0.0269063	1.18649
LOC102467146	0.000840771	0.0269339	0.788697
ALG3	0.000844021	0.0270184	1.24044
ETS2	0.000844457	0.0270184	1.2962
FAM214B	0.000845182	0.0270219	1.28336
KIF25-AS1	0.000845614	0.0270219	0.646434
YPEL5	0.000846754	0.0270416	1.27618
U2AF2	0.000849773	0.0271212	0.800365
HS6ST1	0.000850487	0.0271258	0.783664
TP53I13	0.000850969	0.0271258	1.23273
CLCNKA	0.000852355	0.0271531	0.788592
PRR13	0.000855798	0.0272292	1.22303
S100A13	0.000860515	0.0273276	1.36303
ANKRD49	0.000863516	0.0273315	1.23
HERPUD1	0.000863631	0.0273315	1.21371
LINC01102	0.000863785	0.0273315	0.708048
SCTR	0.000863448	0.0273315	1.51837
CNTFR	0.000866431	0.0273984	0.706193
CNTN1	0.000869337	0.0274282	0.74894
LNC-MKI67IP-6	0.000869688	0.0274282	0.758348
LNC-N4BP2-1	0.000870032	0.0274282	0.759418
LOC101929073	0.000869475	0.0274282	1.32279
MIR99AHG	0.000870036	0.0274282	1.20513
SNAP25-AS1	0.000874836	0.0275627	0.745394
LMNB2	0.000876646	0.0276028	0.742969
BTN3A1	0.000877526	0.0276137	1.28473
IRF6	0.00088044	0.0276593	0.782387
LNC-SESN3-1	0.000880208	0.0276593	1.26171
LAMC3	0.000889378	0.0278845	1.41651
LNC-PTGES2-1	0.000897758	0.0280798	0.819825
CLCN3	0.000900336	0.0281378	1.22392
ALDOC	0.000902018	0.0281609	0.705607
FLT3LG	0.000902866	0.0281703	1.24999
CCDC179	0.000904534	0.0282035	1.30123
USP39	0.00090653	0.0282333	0.835875
L1CAM	0.000907517	0.028247	0.749739
MFSD11	0.000908326	0.0282551	1.19648
ETFDH	0.000910473	0.0283048	1.19967
GATS	0.000913686	0.0283364	1.22582
JPH3	0.000913604	0.0283364	0.741078
SURF4	0.000912893	0.0283364	0.803814
FGL1	0.000914476	0.0283438	0.585031
GTF2H1	0.000922853	0.0285863	1.19405
LNC-KCNQ2-1	0.000925134	0.0286397	0.728188
CHRDL1	0.00092586	0.028645	0.721972
LNC-PTPN1-1	0.000926593	0.0286505	1.33974
SYNE2	0.000933773	0.0288033	0.767183
XLOC_L2_002100	0.000933052	0.0288033	1.34462
XLOC_L2_013837	0.000935876	0.028851	0.703128
PIK3C2B	0.000937043	0.0288697	0.825062
GNG2	0.000938611	0.0288834	0.786092
NIT1	0.000944313	0.0290416	1.23611
LINC00601	0.000944922	0.029043	1.19073
ANAPC1	0.000946394	0.0290456	0.814863
BTBD7	0.000946697	0.0290456	0.792613
LNC-DSG1-1	0.000946046	0.0290456	1.27405
LOC729506	0.000950363	0.0291061	1.59391
SARS2	0.000950106	0.0291061	0.795272
BAIAP2L2	0.000952836	0.0291645	1.30697
CDCA7	0.000958904	0.0292668	0.707324
ESRRA	0.000960246	0.0292668	1.27012
LNC-SAMD14-1	0.000957204	0.0292668	1.22844
LOC285178	0.000960721	0.0292668	0.756422
NDRG1	0.0009582	0.0292668	0.781889
TP53I3	0.000959373	0.0292668	1.48618
CEP170	0.000961652	0.0292778	0.788441
CTSLP8	0.000963332	0.0293117	1.2855
TLR7	0.000964923	0.0293428	0.672713
MAPK8	0.000965735	0.0293501	0.806039
LNC-AUH-2	0.000968512	0.0294172	1.41636
ARHGEF3	0.000970231	0.0294521	1.34346
ELMSAN1	0.000972142	0.0294927	0.809911
MDGA1	0.00097719	0.029611	1.42296
FASN	0.000980067	0.0296807	0.791796
PRRC2B	0.000989408	0.0299284	1.24287
GCC1	0.000991637	0.0299783	1.2572
OBFC1	0.000994923	0.0300248	0.789761
TBC1D15	0.000994471	0.0300248	1.2143
MAP7D3	0.000995842	0.0300349	0.73912
FRMD4A	0.000997679	0.0300727	0.77945
LNC-UQCRFS1-9	0.000999241	0.0301022	1.21834
NOL4	0.00100002	0.0301082	0.746286
ACSL5	0.00100083	0.0301148	0.79041
GSE1	0.00100483	0.0302176	0.721083
UTP20	0.00100827	0.0302857	0.775683
ZFPM1	0.00100772	0.0302857	0.831511
TBK1	0.00101111	0.0303356	1.21372
TBX22	0.0010142	0.0303931	0.755546
TMEM243	0.0010149	0.0303964	1.19335
EEPD1	0.00101618	0.030417	0.834055
MST1	0.00102075	0.0304993	1.32802
ZNF154	0.00102059	0.0304993	1.3292
TMEM171	0.00102531	0.0305838	0.751341
CCNB1	0.00103137	0.0307126	0.704082
CPT2	0.00103142	0.0307126	1.25511
EMC3	0.00103134	0.0307126	1.21711
MKKS	0.00103289	0.0307387	0.839783
RESP18	0.00103389	0.0307506	1.30189
GFOD2	0.00103485	0.0307614	1.1964
MCM6	0.00103567	0.0307679	0.714161
BCKDHB	0.00103859	0.030796	0.799579
ERVK13-1	0.00103898	0.030796	0.759352
FHOD3	0.001039	0.030796	0.775655
AVEN	0.00104392	0.0309064	1.21913
VMO1	0.00104675	0.0309724	1.24879
LINC00243	0.00104739	0.0309735	0.814629
CDV3	0.00105047	0.0309934	1.18098
CHST12	0.00104912	0.0309934	0.810019
EFNB2	0.00104951	0.0309934	0.742839
UBE2D2	0.00105014	0.0309934	0.842464
LOC149351	0.00105164	0.03101	1.3317
PWWP2B	0.00105473	0.0310835	1.26474
ACAP3	0.00105585	0.0310987	1.30172
LRRFIP1	0.00106141	0.0312447	1.36909
LNC-CRIPAK-1	0.0010653	0.0313234	1.40323
LOC400958	0.00106491	0.0313234	1.76122
LAMB2	0.00106717	0.0313449	1.33417
SLC24A2	0.00106725	0.0313449	1.34964
MAP3K10	0.00106853	0.0313647	1.29524
LNC-BCL3-1	0.00107127	0.0314094	1.35715
ZNF726	0.00107112	0.0314094	0.817434
ZNF516	0.00107263	0.0314313	0.836677
ABLIM2	0.00107445	0.0314668	0.745058
NFYC	0.00107863	0.0315713	0.82199
TAOK2	0.00108086	0.0316185	1.29101
CD63	0.00108354	0.031627	1.24926
REXO4	0.00108278	0.031627	1.18759
RPL27A	0.00108361	0.031627	0.749295
SP1	0.00108257	0.031627	0.796978
FNDC4	0.00108473	0.0316414	1.26677
H2AFV	0.00108533	0.0316414	0.752975
SGPL1	0.00108965	0.0317495	0.840226
PABPC3	0.00109399	0.0318501	0.681363
CLEC18B	0.00109823	0.0318799	1.35627
CSRP1	0.00109822	0.0318799	0.836203
EMC8	0.0010968	0.0318799	0.821381
LNC-BHLHE41-2	0.00109907	0.0318799	0.808971
ZNF839	0.00109901	0.0318799	1.20652
EXOC7	0.00110086	0.0319137	1.20048
MAP2	0.00110236	0.0319194	0.767455
RXRA	0.00110297	0.0319194	1.26871
TIMP3	0.00110353	0.0319194	0.750817
LOC401557	0.00110482	0.0319209	0.713278
LNC-MAN2C1-4	0.00110618	0.0319209	0.767039
SHD	0.00110668	0.0319209	0.808491
TBC1D31	0.00110606	0.0319209	0.764273
CAND1	0.0011079	0.0319383	0.807984
LINC00426	0.00111227	0.0320285	1.39374
LNC-FOXA2-1	0.0011122	0.0320285	0.835481
KMT2C	0.00111312	0.0320319	0.848781
LNC-RP11-688I9.2.1-3	0.00111521	0.0320415	1.34969
G6PD	0.0011181	0.0321066	1.40529
LRRC59	0.00111898	0.0321141	0.851753
CCDC88A	0.00112097	0.0321353	0.838074
LNC-WNT1-2	0.00112087	0.0321353	0.803639
GPKOW	0.00112532	0.0322419	1.18936
C19ORF24	0.00112809	0.0322888	1.1984
DBF4	0.0011308	0.0322888	0.698573
FAM19A4	0.00113096	0.0322888	0.850103
GINM1	0.0011321	0.0322888	1.25771
LNC-BAI3-3	0.00113224	0.0322888	0.719944
XLOC_L2_000942	0.00113259	0.0322888	1.32354
ZAK	0.00113062	0.0322888	0.819482
NDNF	0.00113371	0.0322889	1.32691
PINK1	0.00113691	0.0323405	1.23657
TM7SF3	0.00113682	0.0323405	1.19025
APBA3	0.00113936	0.0323745	1.20595
CALB1	0.00113915	0.0323745	0.736157
BCL2L11	0.00114173	0.0323871	0.836208
MGST1	0.0011422	0.0323871	1.62815
MINOS1-NBL1	0.00114091	0.0323871	1.20723
PHYHIP	0.00114295	0.0323871	0.753307
GRAMD1C	0.00114364	0.0323889	1.25577
INTS9	0.00114482	0.0324044	0.838063
LNC-SUMO1-1	0.00114991	0.0324949	0.804559
VPREB3	0.00114932	0.0324949	1.25624
XLOC_L2_007767	0.00114919	0.0324949	0.72083
CADM2	0.0011545	0.032607	0.778474
ADCY1	0.00115567	0.0326109	0.72701
TMEM205	0.00115591	0.0326109	1.19304
KRT8P12	0.00115899	0.0326801	1.30136
KIAA1958	0.00116066	0.032709	0.813351
MIDN	0.00116252	0.032723	0.835798
PWARSN	0.00116369	0.032723	1.2958
TOLLIP	0.00116322	0.032723	1.2382
ZNF383	0.00116189	0.032723	1.25967
C10ORF120	0.00116855	0.0328078	1.28595
EVPL	0.00116755	0.0328078	1.48977
PSMG3-AS1	0.00116862	0.0328078	0.788331
FLVCR1	0.00117376	0.0329164	0.839872
LNC-ZBTB25-1	0.00117368	0.0329164	0.774964
LNC-TPTE-3	0.00117463	0.0329229	1.40323
SON	0.00117738	0.0329441	0.827413
TFE3	0.00117641	0.0329441	1.20667
FAM20B	0.0011798	0.0329713	0.802834
LNC-C5ORF17-4	0.00118225	0.0330108	0.759069
LINC00841	0.0011862	0.0330853	1.45188
LNC-GPR144-1	0.00119106	0.0332028	1.32173
ENPEP	0.00119216	0.0332156	0.751216
RRP15	0.0011962	0.0332922	0.786228
SERINC3	0.00119922	0.0333402	1.22898
ACAT2	0.00120223	0.0333795	0.805081
ORMDL1	0.00120258	0.0333795	1.17293
ZC3H11A	0.00120238	0.0333795	0.85012
PJA1	0.00120543	0.0334407	0.804898
SUZ12	0.00120792	0.0334798	0.857763
ZNF720	0.00120814	0.0334798	0.80726
TSPYL4	0.00121106	0.0335426	0.825071
CIT	0.00121681	0.0336839	0.704673
MEG3	0.00121766	0.0336894	0.777713
LNC-SHANK2-4	0.00121912	0.0336935	0.805579
PCF11	0.00121882	0.0336935	0.826278
DOT1L	0.0012199	0.033697	0.765424
COL1A2	0.00122446	0.0337327	0.754309
LNC-ELTD1-5	0.00122216	0.0337327	1.44299
LRRC4C	0.00122431	0.0337327	0.690161
TPBGL	0.00122327	0.0337327	1.31353
LNC-POLG-1	0.00122516	0.0337338	1.32889
LNC-LIN7A-1	0.00122584	0.0337344	1.35455
CCDC85C	0.00123248	0.0338629	0.847181
LOC102724050	0.00123167	0.0338629	1.48206
MYO1B	0.0012322	0.0338629	0.82432
CACNB3	0.00123525	0.0338669	1.1938
ZNF12	0.00123355	0.0338669	1.1896
NAG20	0.00123703	0.0338876	1.45658
XLOC_L2_010082	0.00124035	0.0339525	0.786306
SLC39A5	0.0012411	0.0339551	1.47067
DCLRE1C	0.00124554	0.0340195	1.23164
LNC-OPN4-1	0.0012461	0.0340195	0.806974
SLC29A4	0.00124552	0.0340195	0.655291
EHBP1L1	0.00125388	0.0341615	1.36489
LNC-ZNF507-3	0.0012533	0.0341615	1.2929
LOC100506895	0.00125208	0.0341615	0.714397
NEK1	0.00125395	0.0341615	1.26884
EID1	0.00125699	0.0342181	0.809493
FLJ25758	0.00125736	0.0342181	1.37905
AMZ2P1	0.00125935	0.0342545	1.24243
AQP7	0.00126398	0.034344	1.35006
ZNF235	0.00126473	0.0343464	1.19986
GRK5	0.00126883	0.0343852	1.40282
NCALD	0.00126788	0.0343852	0.816434
YWHAE	0.00126861	0.0343852	0.835841
MKNK2	0.00127007	0.0344007	0.824273
ZNF7	0.00127133	0.0344166	1.21345
C1ORF56	0.00127339	0.0344545	1.19708
EFNB3	0.00127494	0.0344659	0.835415
MYO7A	0.00127582	0.0344659	0.744253
ZNF547	0.0012756	0.0344659	1.25168
PGGT1B	0.00128026	0.0345495	0.771857
LNC-PTPN14-1	0.00129116	0.034789	0.810391
SFTPC	0.00129202	0.0347942	1.20995
C2ORF40	0.00129493	0.0348456	0.729535
DPYSL2	0.00129635	0.0348456	0.799532
FZR1	0.00130002	0.0348456	0.829918
KCNJ14	0.00129815	0.0348456	1.18929
MT1E	0.0012974	0.0348456	0.537603
NDUFV3	0.00129648	0.0348456	0.85763
PTPN22	0.00129882	0.0348456	1.24972
PTX3	0.00130176	0.0348621	1.51215
UNC79	0.00130198	0.0348621	0.760962
PPEF1	0.00130756	0.0349568	0.813571
UNC13D	0.00130712	0.0349568	0.778003
KIF6	0.00130848	0.0349632	0.76081
NUPL2	0.00131092	0.0350104	1.27049
LOC101927934	0.00131277	0.0350234	1.32073
EIF1AX	0.00132017	0.0352028	0.830708
DHTKD1	0.0013289	0.0353812	0.783139
YPEL4	0.00132892	0.0353812	0.715473
CPA1	0.00133718	0.0355509	0.740874
FUCA1	0.00133766	0.0355509	1.22464
PAPL	0.00133835	0.0355509	1.2949
SYT8	0.00133874	0.0355509	1.30535
TCAIM	0.00133864	0.0355509	0.826862
DTNBP1	0.00134068	0.0355722	1.21914
ZNF410	0.00134093	0.0355722	1.23397
PTPN4	0.00134306	0.0356103	0.77723
HPS5	0.00134438	0.035627	1.17458
CSNK2A2	0.0013458	0.0356463	1.20705
RFX3-AS1	0.00135038	0.0357494	1.45791
HNRNPL	0.00135349	0.0357949	0.798393
LNC-C5ORF47-2	0.00135329	0.0357949	0.777045
ACO2	0.00135464	0.0358069	0.843967
ANKAR	0.00135707	0.0358528	1.24266
MIR4697HG	0.00135979	0.0359062	0.804484
C17ORF96	0.00136079	0.0359143	0.846926
CPB1	0.00136226	0.0359163	0.730378
NCS1	0.00136172	0.0359163	0.803892
PKNOX1	0.00136556	0.0359501	0.78191
DNAJC11	0.00136678	0.0359618	0.811944
HIST1H2BJ	0.00136815	0.0359795	0.798364
SNHG21	0.00136936	0.035993	0.750287
LOC100507195	0.00137581	0.0361426	1.42151
LINC01563	0.00137865	0.0361633	0.676935
SLC43A2	0.00137799	0.0361633	0.744697
AATK	0.00138106	0.0362006	0.753495
LNC-STEAP1B-1	0.00138147	0.0362006	1.3048
LDHA	0.00138374	0.0362417	0.800687
OLFM1	0.00138683	0.0363	1.20696
RPS15A	0.00138738	0.0363	1.24978
REXO2	0.00139265	0.0364194	1.2502
PCLO	0.00139425	0.0364428	0.797653
EMC7	0.00139989	0.0365717	1.16745
G3BP1	0.00140135	0.0365912	0.810247
ADAM11	0.00140335	0.0366064	1.58733
IER5L	0.0014028	0.0366064	0.817432
PRTFDC1	0.00140457	0.0366197	0.826078
GPHN	0.00140594	0.0366368	0.810513
LINC01584	0.00141486	0.0368135	1.25097
SKIDA1	0.00141692	0.03683	0.747991
XLOC_L2_015478	0.00141664	0.03683	1.23702
ARSD	0.0014233	0.0369026	1.25551
JARID2	0.00142439	0.0369026	0.784522
LNC-RP11-166B2.1.1-1	0.00142225	0.0369026	1.41551
LNPEP	0.00142318	0.0369026	1.27725
TDRKH	0.00142122	0.0369026	0.780078
TENM2	0.00142473	0.0369026	0.695238
HSD17B10	0.00143012	0.037023	0.824205
MYT1	0.00143081	0.037023	0.770873
PSPC1	0.00143283	0.0370566	0.688766
MFSD1	0.00143359	0.0370577	1.22557
C8ORF44	0.00144419	0.0372724	1.27006
RPL26	0.00144374	0.0372724	1.29634
ZNF169	0.00144479	0.0372724	0.840032
FBXO25	0.00145534	0.0374269	0.831175
KIF3C	0.00145287	0.0374269	0.856868
LNC-AL136115.1-2	0.00145586	0.0374269	1.46269
LNC-PAPPA-AS1-1	0.00145306	0.0374269	0.741257
LNC-PDCD11-2	0.0014552	0.0374269	0.734383
MARCO	0.00145445	0.0374269	1.38791
RINL	0.00145325	0.0374269	1.31594
GPR37L1	0.00145935	0.0374978	0.769619
AGTR1	0.00146385	0.037582	0.660477
DUSP9	0.00146408	0.037582	1.2549
ATP2B4	0.00146817	0.037612	0.809249
FAM89A	0.00146691	0.037612	1.79067
SKA3	0.00146764	0.037612	0.722937
HEMK1	0.0014694	0.0376248	0.823682
AAED1	0.00147758	0.0377779	1.26791
CCNG1	0.00147614	0.0377779	1.31716
TSTD2	0.0014773	0.0377779	1.21993
CCNDBP1	0.00148401	0.0378964	1.21372
EIF4EBP2	0.0014848	0.0378964	0.829773
HAR1B	0.00148589	0.0378964	0.770179
LINC01018	0.0014846	0.0378964	0.767531
TLE1	0.00148854	0.0379452	0.706628
CSF2	0.00149074	0.0379816	1.85303
SNORD105B	0.00149144	0.0379816	0.712229
FKBP2	0.00150437	0.0382921	1.21093
ATP10B	0.00150678	0.0383321	1.24842
LNC-ADI1-2	0.00150743	0.0383321	0.758869
AGPAT5	0.00150909	0.0383347	0.814434
FXN	0.00151017	0.0383347	0.850163
N4BP2L2	0.00151027	0.0383347	1.2992
PTTG1	0.00151051	0.0383347	0.743153
PDE2A	0.00151265	0.0383556	0.757543
PTGR1	0.00151282	0.0383556	1.34845
KHSRP	0.00151579	0.0384118	0.796107
LHX6	0.00151797	0.0384483	0.698063
MAP1A	0.00152024	0.0384869	1.22973
TMEM57	0.00152419	0.0385624	1.21161
KHNYN	0.00152623	0.0385628	1.20378
CFAP46	0.00152828	0.0385766	0.81566
LINC00200	0.00152794	0.0385766	0.811949
THEM4	0.00152913	0.0385793	0.817941
GATA3-AS1	0.00153249	0.0385967	0.832827
LNC-NDUFA4-2	0.00153161	0.0385967	1.40866
PAK6	0.00153193	0.0385967	0.799693
FBXO2	0.00153455	0.038611	1.34102
HIGD1A	0.00153553	0.038611	0.798366
GLIDR	0.00153698	0.0386127	0.842574
MYT1L	0.0015372	0.0386127	0.744697
EPDR1	0.00154672	0.0388159	1.25379
PNPLA4	0.00154765	0.0388186	0.809612
P4HA2	0.00155243	0.0389196	1.50906
SCARB1	0.00155448	0.0389519	0.829123
NOP14	0.00155997	0.0390705	0.822611
CEP55	0.0015673	0.039197	0.722833
KATNB1	0.00156705	0.039197	0.745405
FUT1	0.00157357	0.0393042	1.26331
MCMBP	0.00157388	0.0393042	0.827096
SOX13	0.00157312	0.0393042	1.39268
MPC1	0.00157781	0.0393644	0.798838
ZNF576	0.00158172	0.0394427	1.22441
BTF3L4	0.00158632	0.0394812	0.791302
PYCR1	0.00158602	0.0394812	1.19336
RERE	0.00158564	0.0394812	0.816104
PPIB	0.00159083	0.0395743	1.22349
CD200	0.00159215	0.039588	0.715987
KDM4C	0.00159332	0.0395979	0.732599
PHOSPHO2-KLHL23	0.00159469	0.0396128	0.750705
PDPR	0.00159674	0.0396447	1.26077
EDA2R	0.00159966	0.0396942	1.27022
LOC102724002	0.00160093	0.0396942	0.787498
USP6NL	0.00160104	0.0396942	0.813492
DNM3OS	0.00160457	0.0397531	1.27805
ELOVL2-AS1	0.00160496	0.0397531	0.810043
FUBP1	0.00160792	0.0398055	0.819629
LNC-THSD4-1	0.00160862	0.0398055	0.806863
RSPO4	0.00160958	0.03981	0.775806
RAD23B	0.0016121	0.0398532	0.789636
LNC-CCDC82-4	0.0016142	0.039867	1.32105
ANP32A	0.00161982	0.0399482	0.79123
NPY	0.00161965	0.0399482	0.786343
SPSB2	0.00161935	0.0399482	1.40487
ZNF585B	0.0016219	0.0399805	1.23937
KIAA2022	0.00162827	0.0401183	0.748296
CLSTN1	0.0016396	0.0403205	0.832237
FAM111B	0.00163937	0.0403205	0.641112
LNC-JOSD1-1	0.00163869	0.0403205	0.820498
FAM155A	0.001642	0.0403236	0.770844
LINC00312	0.00164208	0.0403236	0.744916
PPAP2B	0.00164189	0.0403236	0.774737
RGS20	0.00164862	0.0404457	1.31779
ZNF493	0.0016483	0.0404457	0.741514
FEV	0.0016515	0.0404779	0.757302
GFOD1	0.00165133	0.0404779	1.2198
WDR3	0.00165282	0.040491	0.833203
MICAL3	0.00165379	0.0404956	0.771888
TPR	0.00165519	0.0405104	0.812128
INTS3	0.00166043	0.0406003	0.813725
LOC143666	0.00166002	0.0406003	1.25624
CCDC40	0.00166131	0.0406024	0.838962
NTPCR	0.0016644	0.0406587	1.19508
BCAP31	0.00166735	0.040673	1.18505
CPNE5	0.00166723	0.040673	0.717151
ZHX3	0.00166614	0.040673	0.739178
LOC101928399	0.0016682	0.0406745	0.789122
ACVR1B	0.00167017	0.0406823	0.794583
LNC-C7ORF13-1	0.00167089	0.0406823	0.833548
INMT	0.00167286	0.0406918	1.36755
LINC01397	0.00167255	0.0406918	1.2645
DHRSX	0.00167392	0.0406984	0.795037
STX4	0.00167927	0.04079	1.26417
LNC-MCM5-1	0.00168691	0.0409017	0.857842
SLC29A2	0.0016869	0.0409017	0.778356
BAALC-AS2	0.00170127	0.0412077	1.2315
LAMA3	0.00170442	0.0412452	0.786738
SLC7A14	0.00170398	0.0412452	0.779901
POLR2E	0.00170754	0.0413015	0.802246
LNC-TP53I13-1	0.00170953	0.0413107	1.24317
LNC-SLC45A1-1	0.00171284	0.0413521	1.46847
SIGLEC16	0.0017128	0.0413521	0.834356
TTC7B	0.00171373	0.0413543	0.832835
TMEM120B	0.00171831	0.0414452	0.771222
ST3GAL1	0.00172321	0.0415245	1.64225
FAM98C	0.00172835	0.0416289	1.20461
KAT6A	0.0017313	0.0416611	0.785911
TOM1	0.00173247	0.0416697	1.2787
LNC-CYS1-2	0.00173554	0.0417185	0.762732
RBCK1	0.00173611	0.0417185	1.25194
ZNF30	0.0017384	0.0417347	1.26375
SPN	0.00174018	0.0417579	1.35911
LINC01296	0.00174278	0.0417952	0.795241
TRIM7	0.00174579	0.0417952	1.24604
XLOC_L2_004385	0.00174498	0.0417952	1.28462
ZNF596	0.00174531	0.0417952	1.25056
PIK3R5	0.00175178	0.0418618	1.36997
SMAD2	0.00175182	0.0418618	0.794463
LOC102467212	0.00175271	0.0418637	1.25609
CAMTA1	0.00175617	0.0418918	0.836733
EIF4E2	0.00175499	0.0418918	1.19349
ENC1	0.00175633	0.0418918	0.668724
KCTD12	0.00175907	0.0419379	1.31096
ATP5E	0.00176133	0.0419415	0.80232
FAM228B	0.00176218	0.0419415	1.19374
SIRT5	0.00176329	0.0419415	1.17566
TMCO3	0.00176277	0.0419415	1.3985
CEP57	0.00176681	0.0419864	1.2413
HMGCL	0.00177064	0.0420406	1.27537
SLC25A15	0.00177121	0.0420406	0.81827
LOC401490	0.00177432	0.0420541	1.54519
MYH9	0.00177456	0.0420541	0.648533
SPATA6	0.00177434	0.0420541	1.20799
LNC-EGLN1-1	0.00178602	0.0422869	0.833269
ZBED5-AS1	0.00178573	0.0422869	0.844441
LOC100128885	0.00178879	0.042333	0.726497
ZDHHC20	0.00179169	0.0423822	1.30391
RHNO1	0.00179374	0.0423872	0.811867
WWOX	0.00179519	0.0423872	0.807617
TMEM52	0.00179653	0.0423994	1.32457
MTRNR2L6	0.00180196	0.0424693	1.19219
HUWE1	0.00180765	0.042584	0.799513
HCFC1	0.00180858	0.0425864	0.733909
CENPE	0.00181434	0.0426997	0.744297
LOC101927206	0.00181505	0.0426997	1.29703
LOC101928476	0.00181659	0.0427163	1.24648
UBTD2	0.0018183	0.0427176	0.824026
AMFR	0.00182666	0.0427971	1.26317
B9D1	0.00182534	0.0427971	0.834946
NUP133	0.00182602	0.0427971	0.794641
TRIM24	0.00182596	0.0427971	0.835336
CNTN2	0.00183313	0.0429095	0.792744
HEXB	0.00183864	0.0429861	1.28856
TIMM50	0.00183811	0.0429861	0.847714
NUCB2	0.00184075	0.0430098	1.31252
XLOC_L2_013056	0.00184453	0.0430787	0.761933
C14ORF159	0.00184597	0.0430927	0.843912
CYB5R3	0.00185271	0.0432109	0.769237
ZNF518B	0.00185217	0.0432109	0.742164
CALU	0.00185961	0.0433178	1.40154
CNNM4	0.00185846	0.0433178	0.827364
MIAT	0.00185981	0.0433178	1.54221
COPS8	0.00186654	0.0434039	0.819241
INTS2	0.00186819	0.0434039	0.802801
KIAA1467	0.0018694	0.0434039	0.798808
NUP188	0.00186698	0.0434039	0.729978
ACVR2B-AS1	0.00187158	0.0434348	0.850764
CYB561D2	0.00187488	0.0434919	1.26269
HOGA1	0.001876	0.0434982	0.646751
COLEC12	0.00187707	0.0435034	1.32731
DICER1	0.00187937	0.0435184	0.807787
LOC102724710	0.00187941	0.0435184	0.808587
WDR83	0.00188109	0.0435379	1.19089
GTF3C2	0.00188527	0.0435954	0.822433
ING3	0.00188504	0.0435954	0.778658
CPT1C	0.00188937	0.0435983	1.1974
WDR18	0.00188709	0.0435983	0.846012
XLOC_L2_006036	0.00188962	0.0435983	0.819143
C7ORF25	0.00189163	0.0436251	1.21094
IRF5	0.00189465	0.0436752	1.28373
TBC1D24	0.00189594	0.0436856	0.760754
ATCAY	0.00190094	0.0437615	0.82307
CCBL1	0.0019058	0.0438538	0.770238
WASH1	0.00190952	0.0439199	1.18792
ACAD11	0.00191152	0.0439462	1.26467
NUP205	0.00191289	0.0439581	0.797197
CEND1	0.00191674	0.0440073	1.21458
FAM105A	0.00192017	0.0440665	0.76682
PLAA	0.00192197	0.0440881	1.19418
SMARCD1	0.00192619	0.0441653	0.781154
PBX1	0.00193045	0.0442432	0.80485
LNC-CS-1	0.00193273	0.0442758	1.4958
CCT2	0.00193713	0.0443207	0.822153
HNMT	0.00193691	0.0443207	1.39759
TCFL5	0.00193727	0.0443207	1.17835
KCNK15	0.00193839	0.0443268	1.30643
PLAC1	0.00193945	0.0443313	0.749114
MUM1L1	0.0019413	0.0443479	1.245
NDUFA11	0.00194414	0.0443479	0.8679
PCYT1A	0.00194448	0.0443479	1.23146
RELL1	0.00194203	0.0443479	1.27668
RPUSD1	0.00194349	0.0443479	1.18619
SETDB2	0.00194573	0.0443569	1.23214
C18ORF21	0.00195094	0.0444362	1.19661
MGC39584	0.00195017	0.0444362	1.50418
SUSD3	0.00195724	0.0445601	0.812236
ARMCX6	0.00196048	0.0445684	1.20968
CDK16	0.00196107	0.0445684	0.849437
F3	0.00196017	0.0445684	1.36803
PLD5	0.001961	0.0445684	0.676412
AK9	0.00196598	0.0446013	1.4439
DHFR	0.00196453	0.0446013	0.704381
LNC-NFAT5-1	0.00196414	0.0446013	1.25289
ST13	0.00197356	0.0447538	0.840417
BRD7	0.0019748	0.0447621	1.39248
UBE2J2	0.00197662	0.0447838	1.19134
OR6T1	0.00198004	0.0448388	1.43262
MISP	0.00198201	0.0448467	0.767703
STAB2	0.00198632	0.0449244	0.758376
HIPK2	0.00199252	0.0450256	0.756297
SUCO	0.00199254	0.0450256	1.1801
WDR35	0.00199738	0.0451118	0.817902
ZBTB44	0.0019981	0.0451118	0.817497
SRRM1	0.00200063	0.0451297	0.794345
TMEM19	0.00200065	0.0451297	0.795785
NCBP1	0.00200659	0.0452439	0.815476
MAGIX	0.00201192	0.0453052	1.25238
NFS1	0.00201194	0.0453052	0.862528
TUBA1C	0.00201152	0.0453052	0.627163
EEF1D	0.00201753	0.045321	1.20583
ERC1	0.00202029	0.045321	0.793891
LNC-NCF4-1	0.00201939	0.045321	0.804769
LOC101928659	0.00202187	0.045321	0.773036
NOP10	0.00202232	0.045321	0.852059
PPIA	0.002021	0.045321	0.842193
SEC24B-AS1	0.00202199	0.045321	0.816445
UNC13A	0.00201638	0.045321	0.773989
XXYLT1	0.00201946	0.045321	0.805876
LOC283177	0.00202788	0.0454063	0.763048
HSBP1L1	0.00203263	0.0454608	1.37402
TIMP2	0.00203181	0.0454608	0.792972
DDX19A	0.00203473	0.0454805	0.856507
EFCAB1	0.00203948	0.0455548	0.745211
FAM129A	0.00203982	0.0455548	1.82027
SGOL1	0.00204449	0.0456393	0.738744
LOC101929926	0.00204779	0.0456767	1.20387
TCOF1	0.00204793	0.0456767	0.809449
C4ORF26	0.00205906	0.045885	1.22945
HMGCS1	0.00206383	0.0459368	0.697592
PNMAL2	0.00206405	0.0459368	0.796238
HAND1	0.002066	0.0459603	0.795382
DCX	0.00206981	0.0459926	0.77075
GLYCTK	0.00207013	0.0459926	0.76438
MAN1C1	0.0020689	0.0459926	0.739344
MAP3K14-AS1	0.00207463	0.0460727	1.26593
SCAND2P	0.00207798	0.0461272	1.22013
XLOC_L2_015812	0.00207993	0.0461506	1.28437
PRRX2	0.00208158	0.0461673	0.824867
DKFZP586I1420	0.00208483	0.0462195	1.22471
SNHG8	0.00208856	0.0462823	1.21697
TENM4	0.00209115	0.0463199	0.810997
HPRT1	0.00209755	0.0464146	0.813092
LNC-C11ORF89-1	0.00209657	0.0464146	1.39225
LNC-GPN2-2	0.00210731	0.0465377	0.830055
POGZ	0.00210656	0.0465377	0.806161
SAYSD1	0.0021065	0.0465377	0.844907
LNC-LDLRAP1-1	0.00211221	0.0466198	1.31481
LOC101928824	0.00211283	0.0466198	1.36089
AHSA2	0.00214005	0.0466413	1.26411
C8ORF48	0.00211708	0.0466413	1.23568
CXCR4	0.00212358	0.0466413	0.718386
DVL1	0.00213618	0.0466413	0.825767
HLA-F	0.00211946	0.0466413	1.38374
HTR1E	0.00213145	0.0466413	0.737276
LINC00882	0.00212443	0.0466413	1.26216
LNC-ABI3-1	0.00213417	0.0466413	0.807296
LNC-AC073348.1-2	0.00212845	0.0466413	0.740253
LOC101927963	0.00212253	0.0466413	1.23869
LOC101929565	0.0021229	0.0466413	1.42247
N4BP2L1	0.00212034	0.0466413	1.24594
NUDT8	0.0021396	0.0466413	1.2081
PROSER1	0.00212823	0.0466413	0.816512
PTCHD4	0.00213288	0.0466413	1.25985
RAB33A	0.00213564	0.0466413	0.807746
RGS7	0.00211726	0.0466413	0.786382
RNF14	0.00213887	0.0466413	1.1723
SNHG15	0.00212731	0.0466413	1.20225
SPTBN1	0.00213331	0.0466413	0.779538
ST3GAL4	0.00212695	0.0466413	1.23318
TMX2	0.00213984	0.0466413	1.23698
UHMK1	0.0021321	0.0466413	1.22471
USP14	0.00213992	0.0466413	0.786334
USP27X-AS1	0.00213776	0.0466413	1.19606
ZAN	0.00212618	0.0466413	1.65046
LNC-PPP1R14D-1	0.0021451	0.0467316	1.46297
PABPC4	0.00214874	0.0467912	0.812649
GATA4	0.00215387	0.046883	0.769733
HARS2	0.00216012	0.0469441	1.17204
ING5	0.0021591	0.0469441	0.813529
SBF2	0.00216032	0.0469441	0.808615
ZKSCAN7	0.00215782	0.0469441	0.843301
ANKRD33B	0.00216264	0.0469584	1.49772
LNC-FAM3A-1	0.0021628	0.0469584	1.33264
PRDM10	0.00216587	0.0470052	0.795559
[truncated: 76 more rows]
