# Supplementary material for: A transcriptome based approach to predict candidate drug targets and drugs for Parkinson's disease using an in vitro 6-OHDA model
Source: Royal Society of Chemistry journal article supplement (doi:10.1039/d2mo00267a), 2022-12-20
Supplement: d2mo00267a4.xlsx [file d2mo00267a4.xlsx]

## Sheet: Supplementary Table 3
Supplementary Table 3: The genes in the upregulated subnetwork with a targeting drug in DrugBank. Genes with fold change > 1.70 are given.
	Gene Symbol	p-value	Adjusted p-value	Fold Change	Degree	Betweenness Centrality	Targeting Drugs
1	HMOX1	5.06541e-06	0.00115784	4.11207	9	0.00763517	NADH ; FORMIC ACID ; BILIVERDINE IX ALPHA ; 12-PHENYLHEME ; 2-PHENYLHEME ; VERDOHEME ; STANNSOPORFIN ; 1-({2-[2-(4-CHLOROPHENYL)ETHYL]-1,3-DIOXOLAN-2-YL}METHYL)-1H-IMIDAZOLE ; 1-(ADAMANTAN-1-YL)-2-(1H-IMIDAZOL-1-YL)ETHANONE
2	NQO1	5.17303e-12	8.88796e-08	3.58454	1	0	MENADIONE ; DICOUMAROL ; DUROQUINONE ; 3-HYDROXYMETHYL-5-AZIRIDINYL-1METHYL-2-[1H-INDOLE-4,7-DIONE]-PROPANOL ; 5-METHOXY-1,2-DIMETHYL-3-(4-NITROPHENOXYMETHYL)INDOLE-4,7-DIONE ; CIBACRON BLUE ; FLAVIN ADENINE DINUCLEOTIDE ; 5-METHOXY-1,2-DIMETHYL-3-(PHENOXYMETHYL)INDOLE-4,7-DIONE ; RH-1 ; BISHYDROXY[2H-1-BENZOPYRAN-2-ONE,1,2-BENZOPYRONE] ; 3-(HYDROXYMETHYL)-1-METHYL-5-(2-METHYLAZIRIDIN-1-YL)-2-PHE…
3	ITGB2	2.07555e-08	2.60932e-05	3.41417	3	0.00193399	SIMVASTATIN
4	AKR1C3	3.27446e-08	3.59104e-05	3.23664	2	0.00420168	NADH ; INDOMETACIN ; ANDROSTENEDIONE ; RUTIN ; PROSTAGLANDIN D2 ; FLUFENAMIC ACID ; 2'-MONOPHOSPHOADENOSINE 5'-DIPHOSPHORIBOSE ; 3-CARBOXAMIDO-1,3,5(10)-ESTRATRIEN-17(R)-SPIRO-2'(5',5'-DIMETHYL-6'OXO)TETRAHYDROPYRAN
5	CCKBR	1.81891e-11	1.56257e-07	2.79621	6	3.95176e-05	PENTAGASTRIN ; CHOLECYSTOKININ
6	BLVRB	1.51407e-05	0.00223599	2.04999	2	6.06909e-06	RIBOFLAVIN ; NADH ; BILIVERDINE IX ALPHA ; FLAVIN MONONUCLEOTIDE ; 2'-MONOPHOSPHOADENOSINE 5'-DIPHOSPHORIBOSE ; LUMICHROME ; MESOBILIVERDIN IV ALPHA
7	TUBA4A	3.02076e-11	1.94627e-07	1.99015	15	0.0124749	VINCRISTINE ; PODOFILOX ; EPOTHILONE D ; PATUPILONE ; CYT997 ; CABAZITAXEL ; PHENETHYL ISOTHIOCYANATE
8	CEBPB	1.32417e-05	0.00207457	1.89	12	0.00298602	QUERCETIN
9	ATF3	4.69844e-06	0.00110583	1.88567	10	0.00259688	PSEUDOEPHEDRINE
10	IGLL1	3.60493e-09	6.19374e-06	1.86942	1	0	COPPER
11	PLK2	4.40677e-07	0.000218291	1.86506	3	0.000521409	FOSTAMATINIB
12	CSF2	0.00149074	0.0379816	1.85303	5	0.0048351	KB002
13	CDKN1A	7.37479e-05	0.00595809	1.83676	16	0.00812297	ARSENIC TRIOXIDE
14	CD86	0.000607671	0.0220731	1.80728	2	0	ANTITHYMOCYTE IMMUNOGLOBULIN (RABBIT) ; ABATACEPT ; BELATACEPT
15	TBXA2R	1.19307e-05	0.0020019	1.80543	6	3.95176e-05	RIDOGREL ; SERATRODAST ; MORNIFLUMATE
16	NMNAT1	1.07806e-05	0.00190865	1.78036	2	0.000455465	NICOTINAMIDE MONONUCLEOTIDE ; DEAMIDO-NAD+
17	TXNRD1	3.49314e-06	0.000900251	1.73071	5	0.00115141	ARSENIC TRIOXIDE ; NADPH DIHYDRO-NICOTINAMIDE-ADENINE-DINUCLEOTIDEPHOSPHATE ; FLAVIN ADENINE DINUCLEOTIDE ; SPERMIDINE ; FOTEMUSTINE ; MOTEXAFIN GADOLINIUM ; PX-12
