# Supplementary figures and images for: A transcriptome based approach to predict candidate drug targets and drugs for Parkinson's disease using an in vitro 6-OHDA model
Source: Royal Society of Chemistry journal article supplement (doi:10.1039/d2mo00267a), 2022-12-20

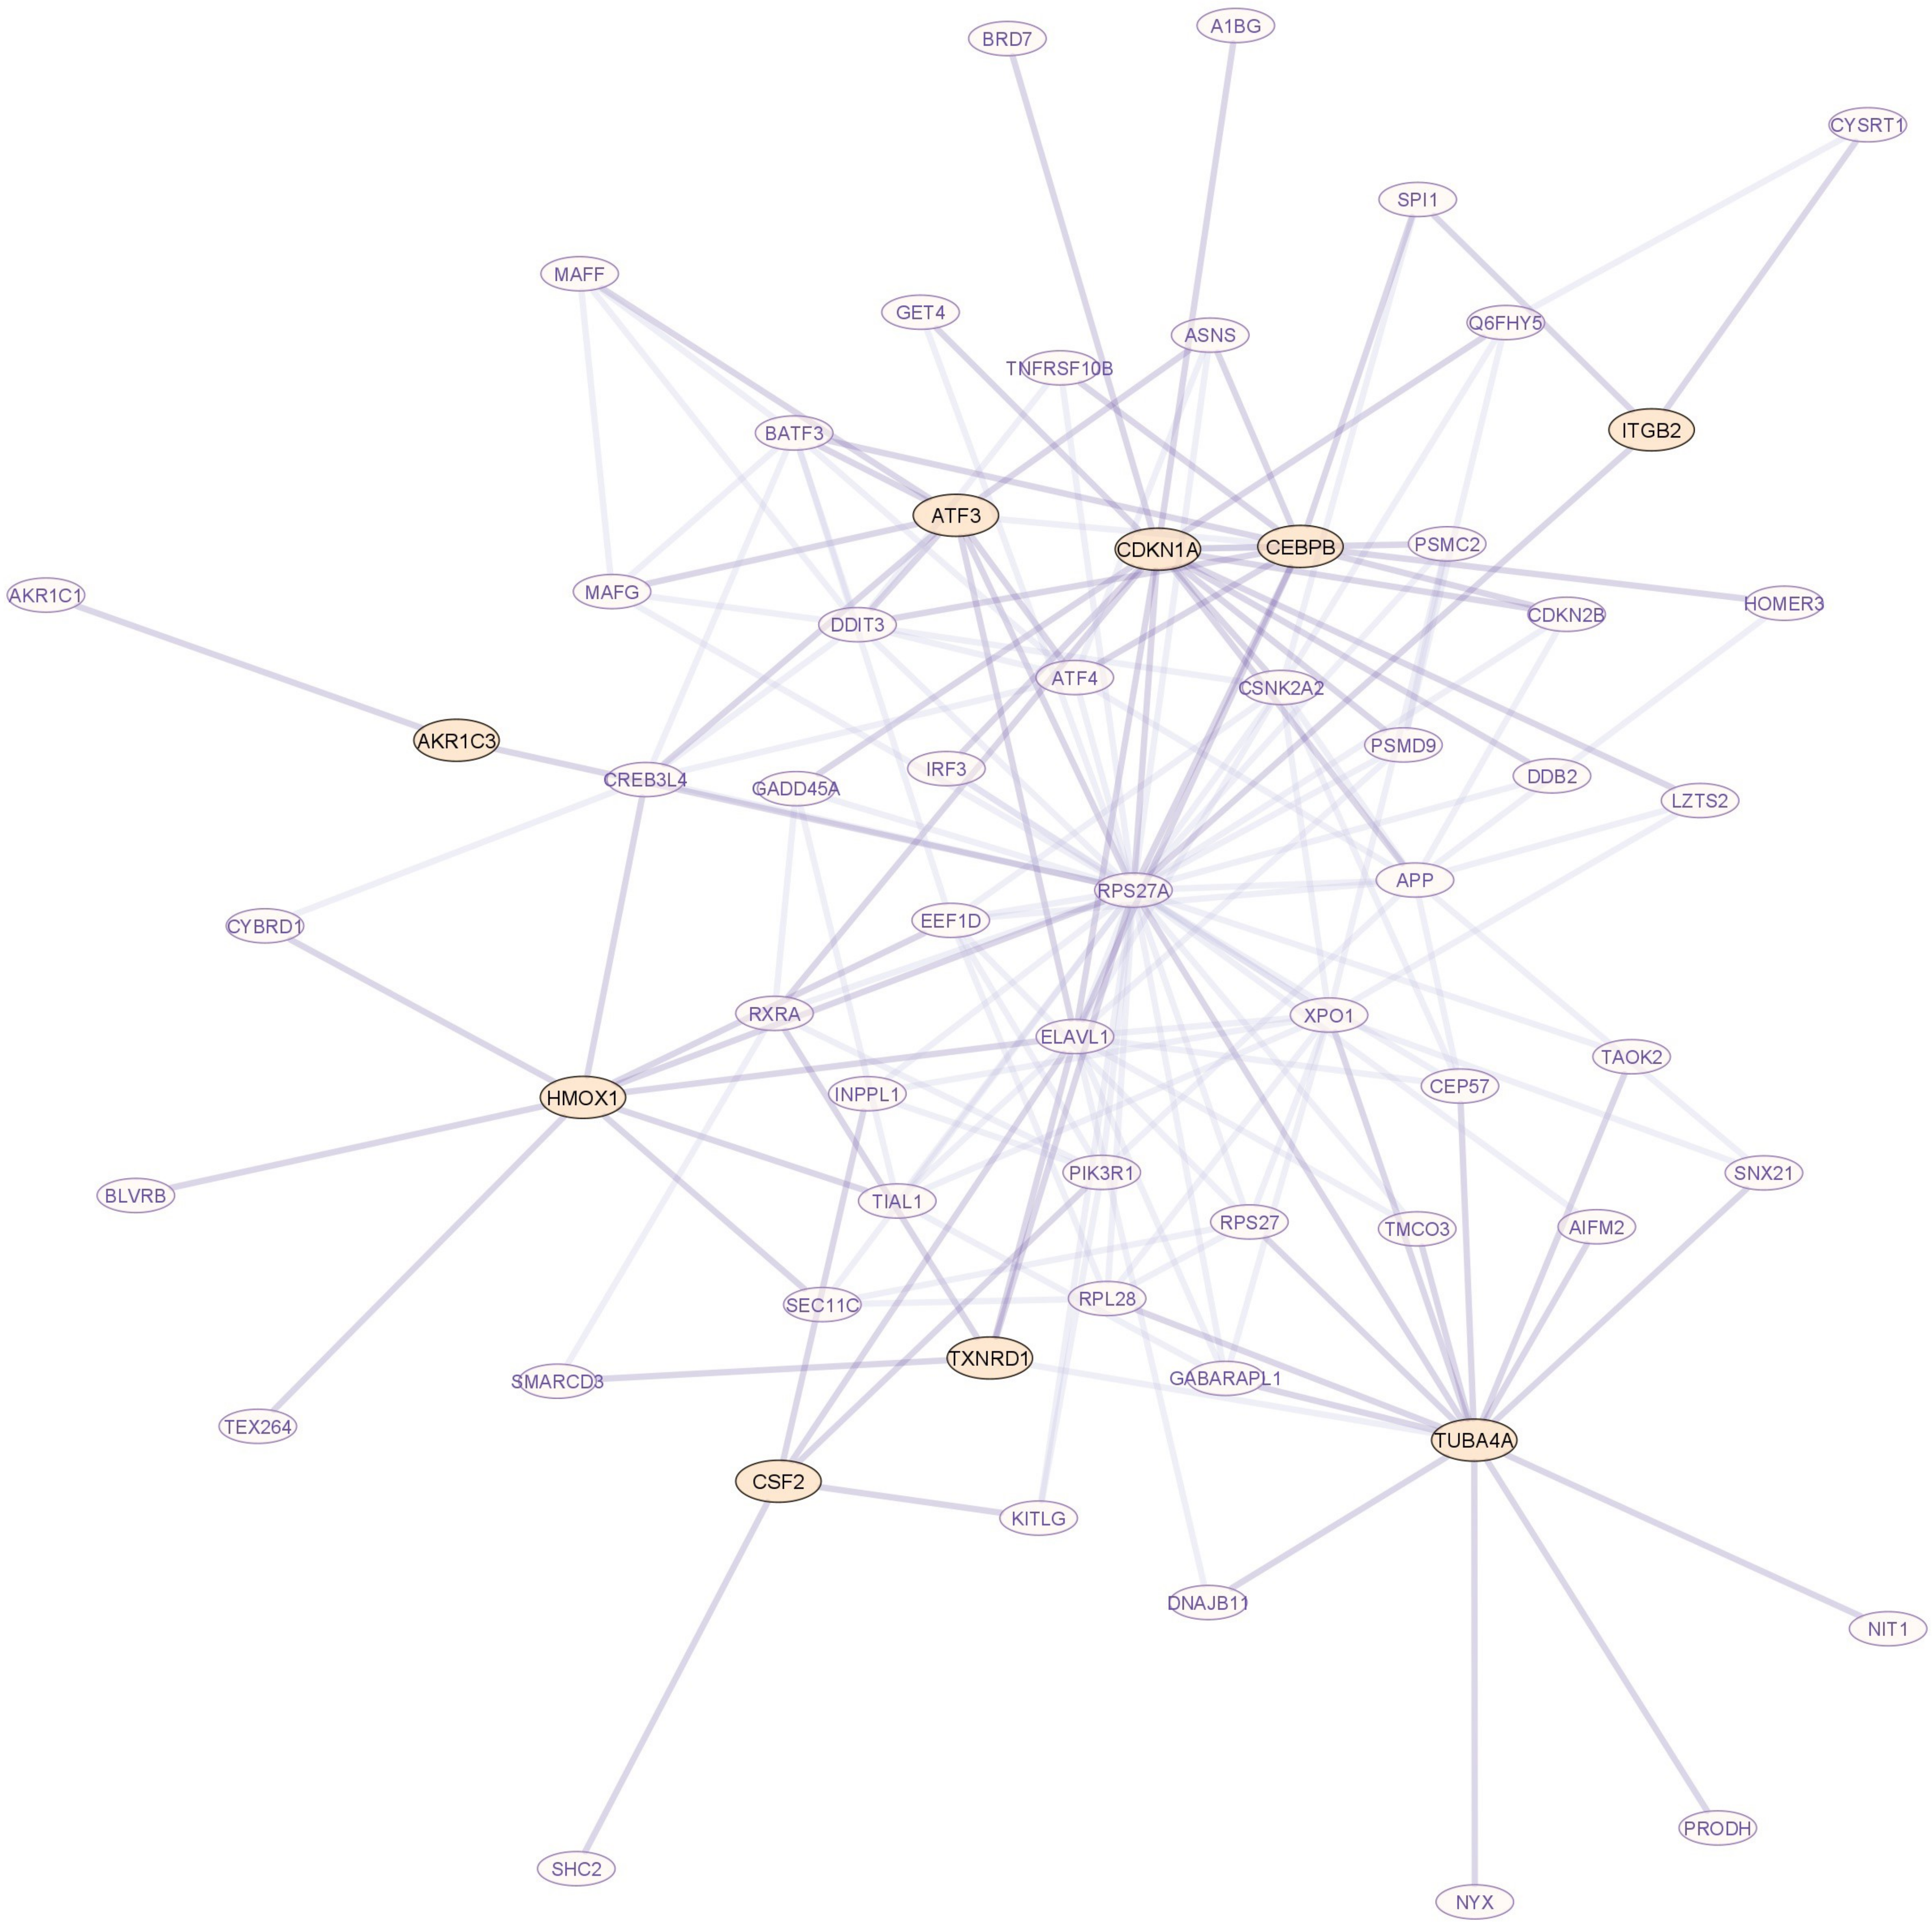

Supplement: d2mo00267a1.pdf [file d2mo00267a1.pdf]
